# 1 **Primate heart regeneration *via* migration and fibroblast repulsion by** 2 **human heart progenitors**

3  
4  
5 Christine Schneider<sup>1¶</sup>, Kylie S. Foo<sup>2¶</sup>, Maria Teresa De Angelis<sup>3¶</sup>, Gianluca Santamaria<sup>3¶</sup>, Franziska  
6 Reiter<sup>1</sup>, Tatjana Dorn<sup>3</sup>, Andrea Bähr<sup>1</sup>, Yat Long Tsoi<sup>2</sup>, Petra Hoppmann<sup>1</sup>, Ilaria My<sup>1</sup>, Anna Meier<sup>3</sup>,  
7 Victoria Jurisch<sup>1</sup>, Nadja Hornaschewitz<sup>1</sup>, Sascha Schwarz<sup>6</sup>, Kun Lu<sup>7</sup>, Roland Tomasi<sup>7</sup>, Stefanie  
8 Sudhop<sup>6</sup>, Elvira Parrotta<sup>8</sup>, Marco Gaspari<sup>8</sup>, Giovanni Cuda<sup>8</sup>, Nikolai Klymiuk<sup>1,9</sup>, Andreas Dendorfer<sup>7,9</sup>,  
9 Markus Krane<sup>5,9</sup>, Christian Kupatt<sup>1,9</sup>, Daniel Sinnecker<sup>1,9</sup>, Alessandra Moretti<sup>3,9\*</sup>, Kenneth R. Chien<sup>2\*</sup>,  
10 and Karl-Ludwig Laugwitz<sup>1,9\*</sup>

11  
12  
13 <sup>1</sup> Medical Department I – Cardiology, Angiology, Pneumology, Klinikum rechts der Isar – Technical  
14 University of Munich, Ismaninger Strasse 22, 81675 Munich, Germany

15  
16 <sup>2</sup> Department of Cell and Molecular Biology, Karolinska Institutet, SE-171 77 Stockholm, Sweden

17  
18 <sup>3</sup> Institute of Regenerative Medicine in Cardiology – Technical University of Munich, Ismaninger  
19 Strasse 22, 81675 Munich, Germany

20  
21 <sup>4</sup> Department of Medicine, Karolinska Institutet, SE-171 77 Stockholm, Sweden

22  
23 <sup>5</sup> Department of Cardiovascular Surgery, INSURE (Institute for Translational Cardiac Surgery),  
24 German Heart Center Munich – Technical University of Munich, Lazarettstrasse 36, 80636 Munich,  
25 Germany

26  
27 <sup>6</sup> Center for Applied Tissue Engineering and Regenerative Medicine (CANTER), Munich University of  
28 Applied Sciences, Lothstrasse 34, 80335 Munich, Germany

29  
30 <sup>7</sup> Walter-Brendel-Centre of Experimental Medicine, University Hospital, LMU Munich,  
31 Marchioninistrasse 27, 81377 Munich, Germany

32  
33 <sup>8</sup> Department of Experimental and Clinical Medicine, Medical School, University of Magna Grecia,  
34 Catanzaro, Italy

35  
36 <sup>9</sup> DZHK (German Centre of Cardiovascular Research) – partner site Munich Heart Alliance, Munich,  
37 Germany

38  
39 Word count: Manuscript 3866 words; Abstract 232 words

40  
41 <sup>¶</sup> These authors contributed equally to this work

42  
43 \* Correspondence should be addressed to A.Mo., K.-L.L. and K.R.C.:

44 [amoretti@mytum.de](mailto:amoretti@mytum.de), [laugwitz@mytum.de](mailto:laugwitz@mytum.de), and [kenneth.chien@ki.se](mailto:kenneth.chien@ki.se)

45 **SUMMARY**

46

47 **Human heart regeneration is one of the most critical unmet clinical needs at a global level<sup>1</sup>.**  
48 **Muscular regeneration is hampered both by the limited renewing capacity of adult**  
49 **cardiomyocytes<sup>2-4</sup> and the onset of cardiac fibrosis<sup>5,6</sup>, resulting in reduced compliance of the**  
50 **tissue. Primate have proven to be ideal models for pluripotent stem cell strategies for heart**  
51 **regeneration, but unravelling specific approaches to drive cell migration to the site of injury and**  
52 **inhibition of subsequent fibrosis have been elusive. Herein, by combining human cardiac**  
53 **progenitor lineage tracing and single-cell transcriptomics in injured non-human primate heart**  
54 **bio-mimics, we uncover the coordinated muscular regeneration of the primate heart *via* directed**  
55 **migration of human ventricular progenitors to sites of injury, subsequent fibroblast repulsion**  
56 **targeting fibrosis, and ultimate functional replacement of damaged cardiac muscle by**  
57 **differentiation and electromechanical integration. Single-cell RNAseq captured distinct modes**  
58 **of action, uncovering chemoattraction mediated by CXCL12/CXCR4 signalling and fibroblast**  
59 **repulsion regulated by SLIT2/ROBO1 guidance in organizing cytoskeletal dynamics. Moreover,**  
60 **transplantation of human cardiac progenitors into hypo-immunogenic CAG-LEA29Y**  
61 **transgenic porcine hearts following injury proved their chemotactic response and their ability to**  
62 **generate a remuscularized scar without the risk of arrhythmogenesis *in vivo*. Our study**  
63 **demonstrates that inherent developmental programs within cardiac progenitors are sequentially**  
64 **activated in the context of disease, allowing the cells to sense and counteract injury. As such,**  
65 **they may represent an ideal bio-therapeutic for functional heart rejuvenation.**

66

67 Whereas mammals do have the capacity to undergo endogenous cardiac regeneration during  
68 development and shortly after birth<sup>7</sup>, the regenerative capacity of the human heart in adulthood is  
69 markedly low<sup>3</sup>. The inability to replace lost myocardium is accompanied by extensive tissue  
70 remodelling and fibrosis, leaving patients with cardiac disease vulnerable to heart failure. Although  
71 numerous drugs and mechanical devices can moderately improve cardiac function, such approaches  
72 do not replace lost cardiomyocytes (CM) or abolish fibrotic scar formation. Over the past decade, *bio-*  
73 *therapies* have emerged as innovative strategies for heart repair<sup>8-11</sup>. Induction of endogenous CM  
74 proliferation<sup>12-15</sup>, *in vivo* direct reprogramming of non-CMs to a cardiac fate<sup>16</sup>, and exogenous  
75 transplantation of human pluripotent stem cell (hPSC)-derived CMs<sup>17</sup> or cardiac progenitors<sup>18</sup> have  
76 been recently explored as potential approaches to generate *de novo* myocardium.

77 Studies in lower vertebrates, where robust cardiac regeneration occurs throughout life, have  
78 demonstrated that endogenous heart repair is a highly coordinated process involving inter-lineage  
79 communication, cellular de- and re-differentiation, migration, and extracellular matrix (ECM)  
80 remodelling without fibrotic scarring<sup>19-22</sup>. Similar programs are the foundation of organ  
81 morphogenesis and are inherent of embryonic cardiac progenitors. During heart development, defined  
82 embryonic precursors, including first heart field (FHF) and second heart field (SHF), give rise to  
83 distinct cardiac compartments and cell types<sup>23,24</sup>. While FHF cells, marked by HCN4 and NKX2.5, are  
84 fated to differentiate early into CMs of the primitive heart tube, ISL1<sup>+</sup> SHF has broader lineage  
85 potential and its differentiation is preceded by an extensive proliferation and directed migration into  
86 the forming myocardium<sup>25-27</sup>. We have recently reported the generation of an enriched pool of hiPSC-  
87 derived ISL1<sup>+</sup> ventricular progenitors (HVPs), which can expand and differentiate into functional  
88 ventricular CMs *in vitro* and *in vivo*<sup>28</sup>. Here, we sought to determine whether HVPs could effectively  
89 provide primate heart regeneration by orchestrating and activating sequential programs of cardiac  
90 development, ultimately leading to *de novo* myocardium formation and fibrotic scar-less healing.

91

## 92 **HVPs functionally repopulate a chronic injury model of non-human primate heart slices**

93 During cardiogenesis, heart progenitors develop in a three-dimensional (3D) micro-environment  
94 incorporating important cues from myocardial architecture and electromechanical forces. To dissect  
95 molecular steps of HVP-mediated cardiac repair at a single cell level, we established an *ex vivo* 3D  
96 chimeric model where HVPs were exposed to the complex structural and molecular environment of  
97 adult heart tissue from non-human primate (NHP). In customized bio-mimetic chambers<sup>29</sup>, native  
98 NHP left ventricle (LV) slices (~300  $\mu$ m thickness) were cultured under physiological preload (1 mN)

99 and continuous stimulation (1 Hz pacing), allowing proper structural and functional preservation for  
100 up to 14 days (D) (Fig. 1a, b and Extended Data Fig. 1a). Subsequently, progressive tissue  
101 deterioration occurred, as indicated by the gradual loss of contractile force that coincided with  
102 increasing apoptotic CM death over time (Fig. 1b, c and Extended Data Fig. 1a, b), offering an ideal  
103 setting for investigating cell-based mechanisms of cardiac repair. *NKX2.5*<sup>eGFP/wt</sup> human embryonic  
104 stem cells (hESC) were coaxed towards *ISL1/NKX2.5* expressing heart progenitors using our  
105 previously described two-step protocol that enriches for HVPs<sup>28</sup>, with small number of multipotent  
106 *ISL1*<sup>+</sup> precursors<sup>30</sup> (Fig. 1a and Extended Data Fig. 1c). After magnetic-activated cell sorting  
107 (MACS)-based depletion of undifferentiated hESCs, cells were seeded onto the NHP LV slices by  
108 standardized bioprinting (Extended Data Fig. 1c, d). eGFP expression regulated by the *NKX2.5* locus  
109 allowed live tracing of HVPs and their derivative CMs within the NHP myocardium (Extended Data  
110 Fig. 1e, top). Labelling with EdU and activated caspase-3 (CICasp3) indicated that eGFP<sup>+</sup> cells were  
111 highly proliferative during the first 2 weeks, but stopped expanding by D21 when eGFP<sup>-</sup> NHP-CMs  
112 underwent massive apoptosis (Fig. 1c and Extended Data Fig. 1f). This corresponded to the extensive  
113 differentiation towards CMs and downregulation of *ISL1* expression (Extended Data Fig. 1g).  
114 Remarkably, heart slices gradually regained contractile force in the third week of co-culture, reaching  
115 2mN force generation that was further maintained up to D50 (Fig. 1b and Extended Data Fig. 1e).  
116 Immunohistochemistry for atrial and ventricular muscle markers (*MLC2a* / *MLC2v*) revealed that the  
117 majority of eGFP<sup>+</sup> cells acquired a ventricular muscle identity over time (Fig. 1d). By D21, ~19%  
118 expressed both markers, indicative of CM entering the ventricular lineage, and ~69% were already  
119 exclusively *MLC2v* positive, representing maturing ventricular CMs. The latter reached ~81% by D50  
120 (Fig. 1d). Moreover, at this stage, most eGFP<sup>+</sup>/*MLC2v*<sup>+</sup> CMs presented a rod-shape appearance with  
121 well-aligned myofibrils, structural characteristics of mature muscle cells (Fig. 1d). A small proportion  
122 of human cells expressing the endothelial marker *CD31* were also detected (~14% on D21 and ~7%  
123 on D50) (Fig. 1e), likely arising from multipotent precursors within the HVP pool.

124 To establish a molecular roadmap for HVP specification and maturation during heart repair,  
125 we profiled cells on D0 (before seeding on NHP LV slices) and eGFP<sup>+</sup> cells isolated on D3 and D21  
126 of *ex-vivo* co-culture by single cell RNAseq (scRNAseq). We then integrated the data with our  
127 previously published scRNAseq dataset from D-3 of *in-vitro* differentiation<sup>31</sup>. Transcriptomes of over  
128 1,615 cells were recovered. Unsupervised clustering analysis identified 7 distinct sub-populations;  
129 stage dependent clustering was evident for all samples (Fig. 1f). On D-3, corresponding to the time  
130 point of cardiac lineage commitment<sup>32</sup>, cells expressed high levels of genes typical of early cardiac

131 mesodermal cells, such as *EOMES*, *MESPI* and *LGR5* (Extended Data Fig. 2a, b and Supplementary  
132 Table 1). On D0, cells distributed into 4 distinct clusters: transcriptomes of early (*KRT18/IDI*),  
133 intermediate (*KRT8/PRDX1*), and proliferating (*TOP2A/CCNB1-2*) heart progenitor states as well as  
134 cardiac mesenchymal cells (*PLCE1/PPA1*) were captured (Fig. 1f and Extended Data Fig. 2a, b).  
135 Transcripts related to extracellular matrix organization (*DCN/TIMP1/LUM/FN1/COL3A1*) and  
136 ventricular muscle structure/maturation (*MYL3/TTN/TNNC1/ACTC1/PLN*) defined late eGFP<sup>+</sup> cells  
137 and ventricular CMs on D3 and D21 within the myocardial tissue, respectively (Fig. 1f and Extended  
138 Data Fig. 2a, b). In order to achieve a temporal resolution of cardiac fate decisions, we aligned cells  
139 captured at the various time points in pseudotime, a computational measure of the progress a cell  
140 makes along a certain differentiation trajectory<sup>33</sup>. The resulting trajectory began with cardiac  
141 mesodermal cells on D-3 followed by mesenchymal cells and early progenitors from D0 and then bi-  
142 furcated into two lineages where endothelial-committed late progenitors on D3 and HVPs and their  
143 derivative CMs on D21 were allocated (Fig. 1g and Extended Data Fig. 2c).

144 Gene ontology (GO) enrichment analysis of differentially expressed genes (DEGs) in cells  
145 from D0 to D21 revealed progressive activation of GO terms related to cardiac ventricular  
146 morphogenesis and maturation, while signalling pathways relevant to the cardiac progenitor state,  
147 such as extracellular matrix organization, cell cycle, and canonical Wnt signalling, were gradually  
148 suppressed (Fig. 1h). Interestingly, genes upregulated in progenitors at the early time of co-culture  
149 also associated with cell migration, cell projection organization, cytokine production, and response to  
150 TGF $\beta$  (Fig. 1h), suggesting a specific sensing-reacting response of HVPs to the tissue environment.  
151 Of note, vasculature development was likewise enriched, confirming the additional potential of some  
152 early precursors to differentiate into vessels. To better define the level of maturation achieved by the  
153 HVP-derived CMs, we integrated our data with a published scRNAseq dataset of *in vivo* human adult  
154 ventricular muscle<sup>34</sup> in pseudotime (Fig. 1i and Extended Data Fig. 2d). eGFP<sup>+</sup> cells on D21 partially  
155 allocated together with adult ventricular CMs at the end of the differentiation trajectory and expressed  
156 high levels of structural, functional, and metabolic genes characteristic of the adult state (Fig. 1i and  
157 Extended Data Fig. 2d). Taken together, our single cell transcriptomic analyses allowed the  
158 construction of a differentiation route through which early mesodermal cardiac progenitors generate  
159 mature CMs in response to the signalling cues of a gradually dying myocardium.

160

161

162 **HVPs directly migrate to and remuscularize the damaged myocardium in an acute NHP heart**  
163 **injury model**

164 Embarking on the heart tissue slices *ex vivo*, we designed a model of acute cardiac injury to provoke  
165 tissue death and elucidate HVP properties in response to injury signals (Fig. 2 and Extended Data Fig.  
166 3). Radiofrequency ablation (RFA) is routinely employed in patients with atrial fibrillation to  
167 terminate arrhythmogenic foci. We established 20W for 15sec as efficient RFA conditions to destroy,  
168 in a standardized manner, a defined area of the cellular compartment within the NHP heart slices,  
169 leaving the extracellular matrix (ECM) as scaffold intact (Extended Data Fig. 3a). A progressive  
170 invasion of activated cardiac fibroblasts (CFs) expressing the discoidin domain receptor 2 (DDR2) as  
171 well as an increase of collagen type I deposition in the RFA-injured area were visible over time, with  
172 a complete scarring of the tissue by D21 (Extended Data Fig. 3b). In the first series of experiments,  
173 we seeded equal amounts of  $NKX2.5^{eGFP/wt}$  HVPs or CMs onto bio-printed pluronic frames on one side  
174 of the NHP heart slices, generated RFA injury on the opposite side, and evaluated the cellular  
175 response to the damage by live cell imaging of the eGFP signal (Fig. 2a). In contrast to CMs, HVPs  
176 departed from their local seeding site and migrated in a directed manner towards the injured region,  
177 colonising it within 4 days (Fig. 2a and Extended Data Fig. 3c, d). By D15, HVPs had differentiated  
178 into CMs and the RFA area appeared largely remuscularized, with new  $eGFP^+$  CMs being elongated  
179 and showing aligned myofibrils with organized sarcomeres on D21 (Fig. 2b). A significant reduction  
180 of scar volume was measured exclusively in HVP-treated heart slices and, consistently, contractile  
181 function of the tissue was considerably improved (Fig. 2c, d and Extended Data Fig. 3e). To assess the  
182 potential of HVP-derived CMs to functionally integrate into the electromechanical syncytium after  
183 injury, we performed real-time intracellular  $Ca^{2+}$  analysis comparing regions of interest (ROI) within  
184 the damaged and native myocardium. In contrast to CM-treated heart slices, Fluo-4 fluorescence  
185 clearly propagated through the injury area when HVPs had been applied, with differentiated HVPs  
186 displaying  $[Ca^{2+}]_i$  oscillations similar to and synchronized with those in adjacent native NHP CMs  
187 (Fig. 2e), indicating electromechanical integration of the HVP-derived CMs.

188 To further dissect the cellular and molecular mechanisms underlying the observed HVP  
189 directed migration towards the RFA injured tissue and the subsequent positive remodelling during the  
190 scarring process, we first evaluated the dynamic cellular composition of the tissue around and at the  
191 injury site over time. Immunofluorescence analysis indicated that, one day after RFA, activated  
192  $DDR2^+$  NHP CFs were heavily populating the border zone and already reached the damaged area  
193 before the human  $eGFP^+$  HVPs; both cells coexisted in the injured and surrounding regions after 1



194 week (Fig. 2f). Shortly after, the RFA site was predominantly colonized by human eGFP<sup>+</sup> cells and  
195 the border zone from NHP DDR2<sup>+</sup> CFs (Fig. 2f). These observations suggested that cell-cell  
196 communication through chemokines or physical interaction between the host CFs and the human  
197 progenitors might instruct HVP migration, differentiation, and scar remodelling.

198

### 199 **Chemotaxis of HVPs to sites of cardiac injury is mediated by CXCL12/CXCR4 signalling**

200 During development ISL1<sup>+</sup> HVPs are highly migratory for heart tube extension and outflow tract  
201 formation<sup>23</sup>. To gain insights into the mode of HVP migration in our cardiac injury model, we first  
202 performed a trans-well migration assay, where HVPs were placed on top of a permeable membrane  
203 and RFA-injured or uninjured NHP heart slices at the bottom (Extended Data Fig. 3f). A significantly  
204 boosted migration was observed in presence of RFA. Interestingly, while multiple, homogeneously  
205 distributed RFAs prompted HVPs to evenly migrate through the membrane, a directional migration  
206 towards the injured area was observed with a single isolated RFA (Extended Data Fig. 3f), indicating  
207 the production of a chemoattractant gradient specifically arising from NHP cells at the damaged area.

208 To further dissect the molecular programs for directed HVP chemotaxis and response, we  
209 profiled migrating eGFP<sup>+</sup> cells (at 24 hours; 485 cells) and arriving eGFP<sup>+</sup> cells at the RFA injury (at  
210 48 hours; 269 cells) as well as eGFP<sup>-</sup> tissue resident host cells (315 cells) by scRNAseq (Extended  
211 Data Fig. 4a). Cells were embedded in low-dimensional space using UMAP followed by unsupervised  
212 clustering. Seven distinct clusters were recovered, which grouped into three main cell populations  
213 (Extended Data Fig. 4a, b and Supplementary Table 1). Cluster 1 and 4 belonged to the NHP cell  
214 group and mapped to CFs and monocyte/macrophages, respectively. Human cells formed the other 2  
215 major cell groups. One contained 4 clusters, which were classified as early HVPs (expressing high  
216 levels of metabolic genes as *MBOAT1*, *UQCRCQ*, and *MT-ND1,2,4,5,6*, but lacking expression of CM  
217 transcripts; cluster 0), activated HVPs (*LAMA5*, *FLRT2*, and *TNC*; cluster 2), proliferating HVPs  
218 (*TOP2A*, *CDC20*, and *CCNB2*; cluster 5), and early ventricular CMs (*MYH6*, *MYL3*, *TNNC1*; cluster  
219 6). The second comprised of a homogeneous population of HVPs (cluster 3) characterized by high  
220 expression of genes involved in chemotaxis (*NRPI1*, *CCL2-19-21*, *CXCL2-6-8-12*, *ITGB1*, *WASF1*,  
221 *RPS4X*, *INPPL1*), an unique gene signature not captured before. GO analysis of DEGs between  
222 cluster 3 and the other HVP clusters identified enrichment of terms related to cell motility,  
223 chemotaxis, actin filament organization, axon guidance cues, and ECM organisation, (Extended Data  
224 Fig. 4c), supporting the migratory feature of this cell population. We further directly characterized the  
225 intercellular communication signals between HVPs and NHP cardiac cells by performing an *in silico*

226 single cell receptor-ligand pairing screen. We found over-representation of a significant pairing of  
227 CXCL12 as ligand with several membrane receptors, including CXCR4, SDC4, ITGB1, and ACKR3  
228 (Fig. 2g). While CXCL12, SDC4, and ITGB1 were expressed in both HVPs and NHP fibroblasts, the  
229 CXCR4 and ACKR3 receptors were highly enriched in the HVPs (Extended Data Fig. 4d). Trans-well  
230 migration assays under gain- and loss-of-function conditions demonstrated that HVPs exhibited  
231 enhanced migratory behaviour under CXCL12 as chemoattractant, which was specifically reduced in  
232 presence of blocking antibodies for CXCR4 and SDC4 (Fig. 2h). Notably, binding of CXCL12 to  
233 SDC4 is known to facilitate its presentation to the CXCR4 receptor<sup>35</sup>. Collectively, our data support  
234 the model that HVPs expressing CXCR4 sense CXCL12 secreted by CFs at the injury site as a  
235 chemoattracting signal to repopulate the damaged myocardial compartment. A similar, chemokine-  
236 controlled deployment of SHF cells has been identified as intra-organ crosstalk between progenitors  
237 and FHF CMs during mouse cardiogenesis<sup>36</sup>, suggesting that migration programs that are functional  
238 during cardiac development are re-activated in HVPs during organ regeneration.

239

#### 240 **Distinct dynamical cellular states underlie HVP regenerative potential upon tissue injury**

241 To capture all transition cell types and analyse the stepwise process of HVP-mediated cardiac repair,  
242 we integrated all scRNAseq data of HVPs on D0, 24h and 48h after RFA injury, as well as HVP-  
243 derived CMs on D21 co-culture (2,114 cells) and generated a diffusion map of tissue damage-induced  
244 cardiac differentiation (Fig. 3a, b). Heat-mapping of gene expression with cells ordered in the  
245 trajectory revealed a temporal sequence of gene expression events and identified cells at intermediate  
246 stages of *injury sensing* and *injury response* (Extended Data Fig. 5a). Dot plotting illustrated gene  
247 signature shifts among the different stages (Fig. 3c). In the first 24h after injury, HVPs “sense” the  
248 tissue damage and activate gene programs for ECM remodelling (e.g. *COL6A1*, *ADAMTS9*, *FLRT2*),  
249 secretion and response to cytokine (*SPP1*, *STX8*, *TGFBI*, *IL6ST*), as well as initiation of migration  
250 (*PLAT*). Subsequently (48h), they upregulate genes typical of migratory cells, including  
251 chemoattraction signalling genes (*PLXNA2*, *CMTM3*, and *CXCL12*), cell motility genes (*SNAI1*,  
252 *SNAI2*, *FAT1*, and *TIMP1*), and transcripts of cytoskeleton organization (*ARPC2*) as well as axon  
253 guidance (*SLIT2*, *NFIB*, and *UNC5B*) and cell projection (*RGS2*, *THY1*, and *ITGA1*). In this *migratory*  
254 state, gene signatures of secretion (*COPB2*, *VPS35*, and *SPTBN1*) and cardiac muscle differentiation  
255 (*VCAM1*, *MHY6*, *PALLD*, and *TMOD1*) become increasingly important as *counteracting* response to  
256 injury (Fig. 3c). Indeed, mass spectrometry analysis of supernatants from NHP heart slices 48h after  
257 RFA injury revealed a significant upregulation of secreted proteins in the presence of HVPs



258 (Extended Data Fig. 5b). Interestingly, the majority of them are involved in ECM organization (e.g.  
259 HSPG2, SPARC, FN1) and fibrotic/inflammation response (e.g. FSTL1, PRDX1, SPTAN1),  
260 reinforcing the capability of HVPs to influence scar remodelling.

261

### 262 **SLIT2/ROBO1 mediates activated fibroblast repulsion and reduces scar formation**

263 CFs play an essential role in heart development and repair. During heart regeneration in zebrafish,  
264 activation of resident fibroblasts support CM growth and maturation through secretion of specific  
265 ECM components<sup>2,37</sup>. To further investigate the temporal and spatial direct crosstalk between CFs and  
266 HVPs in our *ex vivo* cardiac injury model, we isolated CFs from native NHP hearts, stably expressed  
267 dsRed by lentiviral transduction, and performed live imaging during monolayer co-culture with  
268 *NKX2.5<sup>eGFP/wt</sup>* HVPs. RFA injury (20W for 7sec) was performed on one site of the dsRed<sup>+</sup> CF  
269 monolayer and seeding of *NKX2.5<sup>eGFP/wt</sup>* HVPs on the other (Fig. 3d). Similar to the native tissue, the  
270 first cells invading the injured area were dsRed<sup>+</sup> CFs, followed by eGFP<sup>+</sup> HVPs within 5 days (Fig.  
271 3d). Remarkably, while HVPs were directly chemoattracted to the injury, CFs appeared dynamically  
272 repelled at the contact sites with migrating HVPs (Fig. 3e and Extended Data Movie 1). Live cell  
273 tracking of more than 100 cells over 3 days demonstrated that the majority of CFs, after interacting  
274 with HVPs, indeed moved actively away from the HVP migratory path and were repelled from the  
275 injured area when the HVPs started to densely populate it on D8 (Fig. 3e). Immunocytochemistry of  
276 filamentous (F)-actin revealed a specific retraction of cell protrusions precisely occurring at cellular  
277 contact sites with the HVPs (Extended Data Fig. 6a), suggesting that the latter possibly control actin  
278 dynamics of CFs at the interaction sites. Given the detected upregulation of genes involved in axon  
279 guidance in the migratory HVP state, including SLIT2, we postulated that SLIT2/ROBO1 signalling,  
280 a known repulsive guidance cues for neuronal axons<sup>38</sup>, might control HVP-mediated CF repulsion by  
281 regulating cytoskeletal organization and cell motion. Co-immunofluorescence analysis demonstrated  
282 expression of both SLIT2 ligand and ROBO1 receptor in migrating HVPs on D3, while no signal was  
283 detected in the surrounding CFs (Fig. 3f). On D8, however, co-localization of SLIT2 and ROBO1 was  
284 observed mainly at the membrane of repulsed CFs, with enriched SLIT2 signal at the contact sites  
285 with the HVPs (Fig. 3f). Quantitative RT-PCR confirmed that SLIT2 was produced by the HVPs and  
286 ROBO1 was expressed in both cell types at the stage of CF repulsion (Extended Data Fig. 6b). Loss-  
287 of-function experiments using an antibody blocking ROBO1 signalling substantiated that, under  
288 ROBO1 inhibition, HVPs failed to induce actin polymerization and lamellipodia formation in the  
289 interacting CFs, leading to reduced CF motility and lack of repulsion (Fig. 3g, h and Extended Data

290 Fig. 6c). No effects were observed in the distant CFs (Extended Data Fig. 6c). Conversely, treatment  
291 with recombinant human SLIT2 enhanced F-actin content and membrane protrusions specifically in  
292 CFs communicating with HVPs (Extended Data Fig. 6d), resulting in enhanced repulsion (Fig. 3h).

293

### 294 **HVPs regenerate injured porcine myocardium *in vivo* without inducing arrhythmias**

295 To investigate the full regenerative potential of HVPs, we performed allogeneic *in vivo* transplantation  
296 experiments in genetic modified pigs ubiquitously expressing LEA29Y, a human CTLA4-Ig  
297 derivative that blunts systemic T cell response<sup>39</sup>. This immuno-compromised model offers an ideal  
298 setting for testing human cell therapies in xenotransplantation approaches, enabling improved graft  
299 survival. Two epicardial RFA injuries (25W for 7sec) were induced afar in the anterior heart wall and  
300  $6 \times 10^7$   $NKX2.5^{eGFP/wt}$  HVPs were injected ~1cm apart from one damaged site, while the other served as  
301 control (Fig. 4a and Extended Data Movie 2). Morphological assessment of RFA-induced tissue  
302 damage in freshly isolated wild-type porcine hearts demonstrated consistent size of myocardial injury  
303 (Fig. 4b, c). LEA29Y animals were treated daily with methylprednisolone and tacrolimus and  
304 euthanized under full anaesthesia on D3 (n=1), D5 (n=2), and D14 (n=2) post-transplantation. None  
305 showed any macroscopic signs of tumour formation (Extended Data Fig. 7a). Immunohistology on D3  
306 documented a directed, guided migration of eGFP<sup>+</sup> HVPs towards the RFA-injured area (Fig. 4d). On  
307 D5, eGFP<sup>+</sup> cells reached the RFA site, appeared mainly in clusters, and repopulated  $6.3 \pm 0.6\%$  of the  
308 scar (Fig. 4d, f). No significant difference in scar volume was measured at this time point between  
309 HVP-populated and control scars (Fig. 4e). However, 2 weeks after injury, eGFP<sup>+</sup> cells constituted  
310  $21.0 \pm 2.9\%$  of the injured area and scar volume was significantly reduced to half compared to control  
311 scars (Fig. 4d, e). Remarkably, their spatial distribution throughout the scar inversely correlated with  
312 the depth of the analysed plane, denoting the highest concentration of eGFP<sup>+</sup> cells at the more  
313 epicardial layers with the largest damaged area (Fig. 4f). Immunofluorescence analysis demonstrated  
314 that the vast majority of eGFP<sup>+</sup> cells engrafted in the damaged tissue were cTNT<sup>+</sup> CM with elongated  
315 shape, aligned myofibrils, and well-organized sarcomeres (Fig. 4g). Expression of the gap junction  
316 protein connexin 43 was detected at the intercalated discs of eGFP<sup>+</sup> CMs and at the contact zone  
317 between graft and host CMs (Fig. 4g). Moreover, immunostaining for the endothelial marker CD31  
318 documented significantly enhanced neo-angiogenesis at the RFA site after HVP transplantation (Fig.  
319 4h and Extended Data Fig. 7b). Notably, ~6% of CD31<sup>+</sup> cells were of human origin (Fig. 4h). No  
320 evidence of acute graft rejection in the transgenic LEA29Y pigs under the immunosuppressive  
321 regimen was observed on D14 post-transplantation, as assessed by CD68 immunodetection.

322 Interestingly, we even observed a reduction of CD68<sup>+</sup> cells at both injured and adjacent areas in HVP-  
323 treated RFA compared to control (Extended Data Fig. 7c), suggesting that HVPs might directly  
324 influence post-injury inflammation.

325 Ventricular arrhythmias have emerged as major side effect of CM cell therapy.  
326 Electrophysiological studies in large animals consistently observed arrhythmias originating in graft  
327 regions from ectopic pacemakers<sup>40,41</sup>. To assess the electrophysiological consequences of hPSC  
328 derived HVPs, we subjected the two pigs euthanized on D14 to permanent ECG monitoring following  
329 cell therapy and RFA injury using an implantable event recorder. No ventricular tachycardia (VT) was  
330 observed before cell transplantation and only few non-sustained VT episodes occurred shortly within  
331 the first 48h of treatment (Fig. 4i).

332

### 333 **Discussion and future directions**

334 Our *ex vivo* chimeric model of human HVPs and NHP heart tissue provides an unprecedented system  
335 to refine molecular pathways implicated in cardiac regeneration and healing at a single cell resolution.  
336 As such it offers an innovative approach to predict outcome of cell-based regeneration with high  
337 fidelity, which could be applied to other non-regenerative organs such as brain. We demonstrate that  
338 HVPs harbour the unique potential to sense and counter-act injury by reactivating sequential  
339 developmental programs for directed migration, fibroblast repulsion, and ultimate muscle  
340 differentiation in the scar area (Fig. 4j).

341 scRNAseq data unravelled key signalling pathways underlying HVP-mediated heart repair and  
342 scarless healing during an acute injury response, including SLIT2/ROBO1. It will be of particular  
343 interest to evaluate whether pharmacological manipulation of such signalling pathway could  
344 circumvent cell application. Moreover, future studies should assess whether HVP therapy could be  
345 beneficial in clinical settings of chronic heart failure (e.g. ischemic heart disease, genetic  
346 cardiomyopathies, and post-myocarditis) to reduce pre-existing fibrosis. Recently, the ESCORT trial  
347 performed first transplants of hPSC-derived cardiac progenitors surgically delivered as patches onto  
348 the heart's surface in patients with ischemic cardiomyopathy and reported no adverse side effects<sup>18</sup>. In  
349 parallel, translational efforts have evaluated the potential of hPSC-derived CMs to engraft in the heart  
350 of large animals, including primates. Electromechanical coupling and improvement of systolic LV  
351 function have been reported<sup>17,40,41</sup>. However, concerns remain regarding the immaturity of engrafted  
352 CMs, survival of the cells and the propensity for ventricular arrhythmias. We found that *in vivo* hPSC-  
353 derived HVPs transplanted in the injured myocardium of LEA29Y transgenic pigs did not induce

354 sustained VTs over a two week period. Yet, arrhythmogenic potential of cell grafts needs to be further  
355 assessed in long-term analyses. We also observed an increased neovascularization *in vivo*, with a  
356 proportion of endothelial cells being of human origin. Further studies need to demonstrate whether  
357 such neovascularization response will be sufficient to restore normal blood flow. Robust arterial input  
358 will be crucial for permanent functional improvement, which may require a combination of cell  
359 therapy with other modalities.

360 In conclusion, our data indicate that HVPs harbour the unique capability to target both loss of  
361 myocardium and fibrotic scarring in the primate heart, and support their therapeutic potential.  
362 However, before HVP transplantation can be translated to humans much work remains to determine  
363 whether pharmaceutical-grade batches of HVPs (purity  $\geq 90\%$ , yields  $\geq 10 \times 10^7$  cells) can be achieved,  
364 safety risks related to ventricular arrhythmias can be excluded, and the use of hypo-immunogenic PSC  
365 lines can circumvent long-term rejection. Developing innovative therapeutic strategies that are rooted  
366 in fundamental biology of cardiac development could pave the way for successful cell-based cures of  
367 heart disease.

368

## 369 **Methods**

370 **ESC maintenance, cardiac differentiation, and HVP MACS-based purification.** Embryonic stem  
371 cell lines ES03 *NKX2.5<sup>eGFP/wt</sup>* and H9 *NKX2.5<sup>eGFP/wt</sup>*<sup>42</sup> were generously gifted from Dr. David Elliott,  
372 MCRI Australia) and maintained on Matrigel-coated plates (BD Biosciences, Germany) in E8  
373 medium (Gibco, USA) with daily medium change. After reaching a confluency of 85-90%, cells were  
374 passaged by dissociation into single cells using Accutase (Innovative Cell Technologies, USA) at  
375 37°C for 5 minutes and replated in a ratio of 1:6 or 1:9 on new Matrigel-coated plates in E8  
376 supplemented with 5 µM ROCK inhibitor Y-27632 (Stemcell Technologies, Canada) for 24h.  
377 Differentiation to HVPs was achieved according to our previously published protocol<sup>28</sup>. Briefly, after  
378 dissociation with Accutase, ESCs were plated on Matrigel-coated cell culture dishes at a density of  
379  $1 \times 10^6$ /well in E8 supplemented with 5 µM ROCK for 24 hours followed by culture in E8. When full  
380 confluency was reached, differentiation was initiated on day -6 by adding RPMI/B27 minus insulin  
381 (Gibco, USA) supplemented with 1 µM CHIR 98014 (Selleckchem, USA). Media was changed to  
382 RPMI/B27 minus insulin (HVP culture medium; CCM) after 24 hours. On day -3, a combined  
383 medium consisting of 1 ml collected conditioned media and 1 ml fresh CCM supplemented with 2 µM  
384 Wnt-C59 (Selleckchem, USA) was applied and completely replaced by CCM on day -1. On day 0  
385 HVPs were collected for MAC sorting. After dissociation into single cells with Accutase, cells were  
386 stained with Anti-TRA-1-60 MicroBeads (Miltenyi Biotec, Germany) before negative sorting with an  
387 autoMACS Pro Separator (Miltenyi Biotec, Germany) according to manufacturer's instructions. A  
388 fraction of the cells was stained with an anti-human TRA-1-60 antibody conjugated with Alexa Fluor  
389 488 (StemCell Technologies, Canada) and analysed by flow cytometry using a BD FACSCantoII  
390 according to manufacturer's instructions. Batches with <5% TRA-1-60 positive cells were used for *in*  
391 *vivo* transplantation experiments. To generate mature CMs, HVPs were cultured further in 12 well  
392 plates in RPMI/B27 containing insulin and medium was changed every other day. For long-term  
393 storage, cardiac progenitors (D0) or differentiated cardiomyocytes (D25) were frozen in CryoStor cell  
394 cryopreservation media (Sigma Aldrich, USA).

395 ***Ex vivo* NHP heart slice culture.** For *ex vivo* heart slice cultivation, freshly explanted NHP left-  
396 ventricular myocardial tissue was placed in 2,3-Butanedione 2-Monoxime (BDM; Sigma Aldrich,  
397 USA) at 4°C and shipped from the German primate centre, Göttingen, where the primate had been  
398 euthanized in course of a vaccination study (file reference: 33.19-42502-04-16/2264), from  
399 Karolinska Institutet, Sweden (file reference: N 277/14) or from the Walter Brendel Institute, LMU,  
400 Germany (file reference: ROB-55.2--2532.Vet\_02-14-184). Within 12-24 hours, heart tissues were

401 sectioned on vibratome (VT1200S, Leica Biosystems, Germany) to approximately 1 cm x 2 cm x 300  
402  $\mu\text{m}$  thick tissue slices. Slices were anchored in biomimetic cultivation chambers (BMCC) via small  
403 plastic triangles attached to the slices with tissue adhesive (Histoacryl; B. Braun, Germany) according  
404 to fiber direction and subjected to physiological preload of 1 mN and stimulation at 1 Hz (50 mA  
405 pulse current, 1 ms pulse duration), as previously described<sup>29</sup>. The slices were maintained in M199  
406 medium (Sigma Aldrich, USA) supplemented with 1% Penicillin-Streptomycin, 0.5%  
407 Insulin/Transferrin/Selenium (Gibco, USA) and 50  $\mu\text{M}$  2-Mercaptoethanol. Medium was replaced  
408 every other day (2/3 fresh medium, 1/3 conditioned medium). The BMCCs were anchored on a rocker  
409 plate, placed in an incubator at 37°C, 5% CO<sub>2</sub>, 20% O<sub>2</sub> and 80% humidity. Contractile force of the  
410 constructs was continuously measured and contractility data were imported into and analysed by  
411 LabChart Reader software (AD Instruments, New Zealand).

412 **Generation of chimeric human-NHP heart constructs.** Native NHP heart slices within BMCCs  
413 were underpinned with a hand-trimmed filter (0.40  $\mu\text{m}$  pore size) and suspended in 0.5 ml CCM  
414 underneath the filter. For homogenous cell seeding,  $2 \times 10^6$  HVPs were thawed and immediately seeded  
415 onto the tissue within a pluronic F-127 (concentration of 0.33 g/ml, Sigma Aldrich, USA) frame using  
416 a bioprinting device (CANTER Bioprinter V4, Germany), equipped with a 0.58 mm standard Luer-  
417 Lock nozzle (Vieweg® Dosiertechnik, Germany). For selective cell seeding,  $0.5 \times 10^6$  HVPs or D25  
418 CMs were used. In the first 12 hours after seeding, chimeric constructs were cultured in 500  $\mu\text{l}$  CCM  
419 supplemented with 5  $\mu\text{M}$  ROCK inhibitor underneath the filter within BMCCs without rocking and  
420 electrical pacing. Twelve-24 hours after seeding, another 500  $\mu\text{l}$  CCM supplemented with 5  $\mu\text{M}$   
421 ROCK inhibitor were added under the filter and rocking (60 rpm, 15° tilt angle) was resumed. After  
422 24h, medium was entirely replaced with 1 ml CCM. On day 2, co-culture slices were maintained in  
423 2.4 ml CCM with continuous electrical pacing (1 Hz) and rocking. Medium was replaced every other  
424 day (2/3 fresh medium, 1/3 condition medium).

425 **RFA-induced myocardial injury.** Native NHP heart slices with selectively seeded HVPs or CMs  
426 were injured on the opposite tissue border 3 days after cell seeding by applying 20 W for 15 sec using  
427 a THERMOCOOL® SF Uni-Directional Catheter, tip electrode 3.5 mm (Biosense Webster, USA) and  
428 Stockert 70 radiofrequency (RF) generator (Biosense Webster, USA). During the RFA procedure,  
429 physiologic preload was reduced to 0.5 mN within BMCC that was readjusted to 1 mN after 2 days.  
430 For *in vivo* experiments, epicardial radiofrequency ablation with 25 W for 7 sec was performed to  
431 produce a standardized, non-transmural injury.



432 **Proliferation analysis by flow cytometry.** For quantification of proliferation, HVPs on day 0 of  
433 monolayer culture and day 3, 7 and 14 of co-culture were incubated with 10  $\mu$ M EdU for 24 hours,  
434 dissociated with 480 U/ml collagenase type II, fixed with 4% paraformaldehyde (PFA) for 15 min at  
435 room temperature (RT), washed three times with PBS and processed using the Click-iT EdU594 Flow  
436 Cytometry Assay Kit (Thermo Fisher, USA) according to manufacturer's instructions. Flow  
437 cytometry data were acquired with a Gallios flow cytometer (Beckman Coulter, USA) and evaluated  
438 with Kaluza software version 1.2 (Beckman Coulter, USA).

439 **Ca<sup>2+</sup> imaging of RFA-injured heart slices.** NHP heart slices seeded with HVPs/CMs after RFA  
440 injury were loaded with 3  $\mu$ M Fluo-4-AM in CCM (without phenol red) supplemented with 0.75%  
441 Kolliphor EL (Sigma Aldrich, USA) by incubation at 37°C for 60 minutes, washed, and incubated for  
442 another 30 min at 37°C to allow de-esterification of the dye in Tyrode's solution supplemented with  
443 Ca<sup>2+</sup> (135 mM NaCl, 5.4 mM KCl, 1 mM MgCl<sub>2</sub>, 10 mM glucose, 1.8 mM CaCl<sub>2</sub>, and 10 mM  
444 HEPES; pH7.35). Calcium signals from native NHP CMs and seeded HVPs were subsequently  
445 imaged using an inverted microscope DMI6000 B (Leica, Germany) equipped with a 10x objective, a  
446 GFP filter set and a Zyla V sCMOS camera (Andor Technology, UK). Point stimulation electrodes  
447 were connected to an HSE stimulus generator (Hugo Sachs Elektronik, Germany) providing  
448 depolarizing pulses (40 V, 3 ms duration) at 1 Hz on the tissue border opposite the RFA injury.  
449 Imaging settings (illumination intensity, camera gain, binning) were adjusted to achieve an optimal  
450 signal to noise ratio with an imaging rate of 14 Hz. ImageJ ROI Manager was used to quantify  
451 fluorescence over single cells and background regions. Subsequent analysis was performed in RStudio  
452 using custom-written R scripts. After subtraction of background fluorescence, the time course of Fluo-  
453 4 signal intensity was expressed as arbitrary units.

454 **Cell isolation for scRNA-sequencing.** For scRNAseq, co-culture patches on day 0, 3 and 21 without  
455 RFA, as well as on day 1 and 2 after RFA were dissociated using 20 U/ml papain<sup>43</sup> (Worthington  
456 Biochemical, USA), filtered through a 70  $\mu$ m filter and resuspended in 3% BSA in PBS. Using  
457 FACSaria III (Becton Dickinson), eGFP<sup>+</sup> cells on day 0, 3 and 21 without RFA and eGFP<sup>+</sup> and eGFP<sup>-</sup>  
458 cells on day 1 and 2 after RFA were sorted into individual wells of 384-well plates containing Smart-  
459 Seq2 cell lysis buffer (ERCC 1:4 x10<sup>7</sup> dilution). The lysed single cells were stored at -80°C prior to  
460 complementary deoxyribonucleic acid (cDNA) synthesis, using the Smart-Seq2 protocol. The quality  
461 of the cDNA was confirmed using Agilent Bioanalyzer (Agilent, USA) and RNAseq libraries were  
462 prepared using in-house compatible Tn5 and Nextera index primers (Illumina, USA). Following a  
463 final clean-up, the size distribution of the sequence libraries was verified using Agilent high-

464 sensitivity chip and the concentration of each library was measured using the Qubit3 Fluorometer  
465 (Thermo Fisher, USA).

466 **scRNAseq and gene expression analysis.** scRNAseq was performed at the sequencing facility of the  
467 Karolinska Institutet using the Genome Analyzer HiSeq2500 (Illumina, USA) for single-end  
468 sequencing of 56 bp. The Genome Analyzer Analysis Pipeline (Illumina, USA) was used to process  
469 the sequencing files of raw reads in the FASTQ format. The cDNA insert was aligned to the  
470 hg19/Mmul\_1 reference genomes using Tophat2, combined with Bowtie2. Only confidently mapped  
471 and non-PCR duplicates were used to generate the gene-barcode cell matrix. Further, quality check  
472 steps, including the identification of highly variable genes, dimensionality reduction, standard  
473 unsupervised clustering algorithms and the differentially expressed genes analysis were performed  
474 using the standard Seurat R pipeline<sup>44</sup>.

475 **Cell clustering, UMAP visualization and marker-gene identification.** The gene-barcode matrix  
476 was scaled, normalized and log-transformed. The dimensionality of the data was reduced by principal  
477 component analysis (PCA) (20 components) first and then with UMAP (resolution = 0.3). Then, all  
478 cells from each cluster were sampled and differentially expressed genes across different clusters were  
479 identified with the FindAllMarkers and FindMarkers functions of Seurat R package. Clusters were  
480 assigned to known cell types on the basis of cluster-specific markers (Supplementary Table 1).

481 **Integrated analysis of single-cell datasets.** To integrate and validate the robustness of our analysis,  
482 we took advantage of two recently published single cell profiles<sup>31,34</sup>. To reduce batch-effect  
483 differences, we used the Seurat alignment re-scaling and re-normalizing for the integrated dataset. For  
484 all new integrated datasets, we identified variable genes generating a new dimensional reduction that  
485 was used for further analysis. Pseudotemporal ordering was done using Monocle 2<sup>45</sup>. In brief, an  
486 integrated gene-expression matrix was constructed as described above. With the function  
487 differentialGeneTest we analysed differentially expressed genes across different development  
488 conditions. At max the top 3,000 genes with the lowest q value were used to construct the pseudotime  
489 trajectory.

490 **Determination of biological processes and molecular function on the basis of enrichment**  
491 **analysis.** Statistical analysis and visualization of gene sets were performed using the clusterProfiler R  
492 package<sup>46</sup>. GSEA databases were used to determine the enrichment of biological processes, cellular  
493 components and molecular function on the basis of the genes that were significantly upregulated.  
494 Process-specific signatures were defined by the top genes as ranked by the significance and  
495 expression scores.

496 **NHP CF isolation and lentiviral transduction.** Freshly explanted NHP left ventricular myocardium  
497 was minced into small pieces and incubated with 550 U/ml collagenase II (Worthington, USA) at  
498 37°C for 15 minutes in a series of 6 digestions. Every 15 minutes the supernatant was collected and  
499 centrifuged at 300 g for 5 minutes and washed twice with DMEM/F-12 (Gibco, USA). Isolated  
500 cardiac fibroblasts (CFs) were cultured in CF Medium (CFM; DMEM-F12, 10% fetal bovine serum, 2  
501 mM L-Glutamine, 0.5% Penicillin/Streptomycin) at 37°C and 5% CO<sub>2</sub> with media change every other  
502 day. For CF passaging 0.05% Trypsin-EDTA (Gibco, USA) was used.

503 For lentiviral transduction, a dsRed-expressing lentivirus was produced using a pRRLsin-18-PGK-d  
504 transfer plasmid combined with the packaging plasmid (pCMVdR8.74) and the envelope plasmid  
505 (pMD2.VSV.G) in HEK293T cells. The CFs were incubated with PGK-dsRed lentivirus and 8 µg/mL  
506 of polybrene hexadimethrine bromide (Sigma Aldrich, USA) for 24 hours at 37°C, 5% CO<sub>2</sub> and the  
507 transduction efficiency was evaluated by dsRed expression after 96 hours.

508 **Monolayer co-culture of HVPs and CFs for cell interaction studies after RFA injury.** NHP-  
509 CF<sup>dsRed</sup> (1x10<sup>4</sup>/well) were seeded in 4-well chamber slides (Thermo Fisher, USA) coated with  
510 fibronectin (Sigma Aldrich, USA). After 3 days, RFA injury (20 W, 7 sec) was introduced on one  
511 border of the chamber slide followed by seeding of 5x10<sup>5</sup> HVPs on the opposite side. Cellular  
512 migration and interaction were studied by time-lapse microscopy (image acquisition every 90 minutes  
513 for 3 days; daily medium change with CCM). For the analysis of CF repulsion, anti-ROBO1 (5 µg/ml)  
514 and rhSLIT2 (2 µg/ml) treatments (Supplementary Table 2) were performed on days 7 and 8 after  
515 RFA injury and HVP seeding and stopped after 10 minutes, 40 minutes and 24 hours. Video clips  
516 were analysed with ImageJ for cell movement of HVPs and CFs by TrackMate plug-in<sup>47</sup>.

517 **Identification of migratory signaling by trans-well migration assay.** For trans-well migration  
518 studies, the CytoSelect™ Cell Migration and Invasion Assay (Cell Biolabs, USA) was used and  
519 samples were processed according to manufacturer's instructions. In brief, 0.5x10<sup>6</sup> HVPs (D0) were  
520 suspended in 300 µl serum-free medium and plated on the upper compartment of the trans-well  
521 migration assay (polycarbonate membrane inserts; 8 µm pore size). The chemoattractant factor  
522 CXCL12 was added in two different concentrations (low dose = 20 ng/ml, high dose = 80 ng/ml) to  
523 500 µl RPMI in the lower compartment. Agents that inhibit cell migration were added directly to the  
524 cell suspension in the upper compartment (CXCR4-RB (12 µg/ml), SDC4-RB (1:500), ITGB1-RB (8  
525 µg/ml), ACKR-RB (10 µg/ml)) (Supplementary Table 2). The cells were incubated for 24 hours in a  
526 standard cell culture incubator. For quantification of migratory cells, medium was carefully aspirated  
527 from the upper compartment and all non-migratory cells inside the insert were removed with cotton-

528 tipped swabs. Next, inserts were stained in 400  $\mu$ l Cell Stain Solution for 10 minutes at RT, followed  
529 by 5x washing with PBS and air-drying. Migratory cells were imaged with a light microscope under  
530 100x magnification objective, with at least three individual fields per insert.

531 **Label-free secretome analysis.** Protease inhibitors (Complete mini EDTA Free, Thermo Fisher,  
532 USA) were added to collected medium and supernatant concentration was achieved by ultrafiltration  
533 using MWCO protein concentrators (Thermo Fisher, USA). Proteins (50  $\mu$ g) were diluted in 1% SDS,  
534 50 mM dithiothreitol, 100 mM Tris buffer (pH 8.0), denatured for 10 min at 95°C and digested by  
535 filter-aided (Merck Millipore, USA) sample preparation for proteome analysis (FASP)<sup>48</sup>. Next,  
536 overnight digestion was performed at 37°C with 60  $\mu$ l digest buffer containing 500 ng trypsin (Sigma  
537 Aldrich, USA) in 50 mM triethylammonium bicarbonate buffer (pH 8.5). Peptides were recovered by  
538 adding 140  $\mu$ l HPLC-grade water and centrifugation of filters for 25 minutes at 14,000 g (final  
539 volume: 200  $\mu$ l tryptic digest). An aliquot corresponding to 10% of the digest volume was purified by  
540 strong cation exchange StageTips<sup>49</sup>. The eluate (10  $\mu$ l containing 500 mM ammonium acetate in 20%  
541 acetonitrile) was diluted 10x in 0.2% formic acid and injected for nanoscale LC-MS/MS analysis (4  
542  $\mu$ l). Tryptic peptides were analysed by nanoscale LC-MS/MS by a Top-12 data-dependent analysis  
543 method run on a Q-Exactive “classic” instrument (Thermo Fisher, USA)<sup>50</sup> with a gradient length of 85  
544 min. Raw data were loaded in MaxQuant (v 1.6.2.6a) for database search and label-free quantification  
545 by the MaxLFQ algorithm (Cox Mann, MCP 2014). For data processing, default parameters in  
546 MaxQuant were adopted, except for the following: LFQ min. ratio count: 2; fast LFQ: ON;  
547 quantification on unique peptides; match between runs (MBR): activated between technical replicates,  
548 not between different samples (achieved by assigning a separate sample group to each biological  
549 sample and allowing MBR each group only). For protein identification, MS/MS data were queried  
550 using the Andromeda search engine implemented in MaxQuant against the Homo Sapiens Reference  
551 Proteome (accessed in December 2019, 74,788 sequences) and the Macaca Fascicularis Reference  
552 Proteome (accessed in January 2020, 46,259 sequences).

553 **RNA isolation, reverse transcription PCR (RT-PCR), and quantitative real-time PCR (qRT-  
554 PCR).** Total RNA of CFs/HVPs co-culture and conditioned CFs exposed to co-culture medium was  
555 extracted using the Absolutely RNA Miniprep Kit (Agilent Technologies, USA) according to the  
556 manufacturer’s instructions and 1  $\mu$ g was reverse transcribed using the High-Capacity cDNA Reverse  
557 Transcription kit (Thermo Fisher, USA). qRT-PCR was performed using 25 ng cDNA per reaction  
558 and the Power SYBR Green PCR Master Mix (Thermo Fisher, USA). Gene expression levels were  
559 assessed in three independent biological samples and normalized to glyceraldehyde-3-phosphate

560 dehydrogenase (*GAPDH*) expression by using the comparative cycles of threshold (Ct) method ( $\Delta$ Ct).  
561 qRT-PCR assays were run on a 7500 Fast Real Time PCR system (Thermo Fisher, USA) and the data  
562 were processed using 7500 software v2.3. Following primers were used: GAPDH\_Fw:  
563 TCCTCTGACTTCAACAGCGA; GAPDH\_Rv: GGGTCTTACTCCTTGGAGGC; ROBO1\_Fw:  
564 GGGGGAGAGAGAGTGGAGAC; ROBO1\_Rv: AGGCTCTCCTACTGCAACCA; SLIT2\_Fw:  
565 TAGTGCTGGCGATCCTGAA; SLIT2\_Rv: GCTCCTCTTTCAATGGTGCT.

566 **Pig experiments and treatments.** Pigs were sedated by intramuscular injection of ketamine  
567 (Ursotamin<sup>®</sup>, Serumwerk Bernburg, Germany), azaperone (Stresnil<sup>®</sup>, Elanco Animal Health, Bad  
568 Homburg, Germany) and atropinsulfate (B. Braun, Melsungen, Germany) and kept in full anaesthesia  
569 with mechanical ventilation by continuous intravenous application of propofol (Narcofol<sup>®</sup>, CP  
570 Pharma, Burgdorf, Germany) and fentanyl (Fentadon<sup>®</sup>, Eurovet Animal Health BV, Bladel,  
571 Netherlands). Following left lateral thoracotomy, the pericardium was opened and the anterior wall of  
572 the left ventricle was exposed. After induction of RFA injuries and injection of HVPs, the thorax was  
573 closed using multiple layers of sutures. To continuously monitor heart rate and function during the  
574 follow-up period, a cardiac event recorder (BioMonitor 2, Biotronik, Berlin, Germany) was implanted  
575 subcutaneously on the left thorax wall of the D14 group pigs. All pigs had a central venous catheter  
576 (Careflow<sup>™</sup>, Merit Medical, Galway, Ireland) inserted via the lateral ear vein that remained in place  
577 over the whole course of the follow up period.

578 For additional immunosuppression, 5mg/kg methylprednisolone was applied intravenously on day 1  
579 and 2.5mg/kg on day 2 (Urbason<sup>®</sup>, Sanofi-Aventis, Frankfurt, Germany). Further, all pigs received a  
580 once daily oral dose of 0.2mg/kg tacrolimus (Prograf<sup>®</sup>, Astellas Pharma, Munich, Germany) and  
581 20mg/kg oral mycophenolat-mofetil (CellCept<sup>®</sup>, Roche, Penzberg, Germany) twice daily over the  
582 whole course of the experiment. For euthanasia, pigs were placed in full anaesthesia as described  
583 above and circulation was terminated by systemic injection of potassium chloride (B. Braun,  
584 Melsungen, Germany).

585 All pig experiments were performed with permission of the local regulatory authority, Regierung von  
586 Oberbayern (ROB), Sachgebiet 54, 80534 München (approval number: AZ 02-18-134). Applications  
587 were reviewed by the ethics committee according to §15 TSchG German Animal Welfare Law.

588 **Transplantation of HVPs into porcine hearts *in vivo*.** HVPs sorted by MACS with <5% TRA-1-60<sup>+</sup>  
589 cells were used for transplantation experiments in pigs. Briefly, 6x10<sup>7</sup> sorted HVPs were suspended in  
590 10 µl CCM supplemented with 5 µM ROCK inhibitor on the day of transplantation. Cells were spun  
591 down after thawing, and only the cell pellet was transplanted using insulin syringe. After exposing the



592 pig heart by lateral thoracotomy and generation of non-transmural RFA injury as described above, the  
593 cell suspension was injected approximately 1 cm apart from the injury. At injection sides, U-stitches  
594 with pericardial patches were placed and closed using a tourniquet to reduce cell loss during cell  
595 application (Extended Data Movie 2).

596 **Sample processing and immunofluorescence analysis.** Cells on chamber slides were fixed with 4%  
597 PFA for 10 min at RT. Co-culture 3D constructs were fixed in 4% PFA for 30 min at 4°C,  
598 cryopreserved with ice-cold methanol/acetone for 10 min at -20°C and sectioned at 12 µm in Tissue-  
599 Tek O.C.T. compound (Sakura Finetek, JP). Freshly explanted pig hearts on D3, D5 and D14 after  
600 RFA injury and HVP injection were examined for macroscopic signs of tumour formation before  
601 RFA-injured areas with corresponding HVP/control injection sites were manually excised and fixed  
602 with 4% PFA for 24 hours at 4°C, followed by cryopreservation with ice-cold methanol/acetone for  
603 30 min at -20°C and sectioning at 12 µm in O.C.T. compound.

604 For immunofluorescence staining, samples were washed three times with PBS, permeabilised and  
605 blocked with 0.1% Triton X-100 and 10% fetal bovine serum (FBS) for 2 hours at RT (co-culture and  
606 monolayer samples) or overnight at 4°C (*in vivo* samples).

607 Primary antibodies against desired epitopes (Supplementary Table 2) were incubated overnight at 4°C  
608 at the indicated dilutions in 1% FBS, 0.1% Triton X-100 in PBS. After washing five times with 0.1%  
609 Triton X-100 in PBS for 5 minutes, appropriate secondary antibodies (1:500) were added in 1% FBS,  
610 0.1% Triton X-100 in PBS for 2 hours at RT protected from light. After washing three times for 5  
611 minutes with 0.1% Triton X-100 in PBS, Hoechst 33258 was added at a final concentration of 5  
612 µg/mL in PBS for 15 minutes at RT. After washing three times with PBS, samples were covered with  
613 fluorescence mounting medium (Dako, USA) and stored at 4°C. Images were acquired using a  
614 DMI6000-AF6000 or SP8 confocal laser-scanning Leica microscope. Images were assigned with  
615 pseudo-colors and processed with ImageJ. Quantification of scar volumes, eGFP<sup>+</sup> area and cell-type  
616 proportions were performed with image J cell counter notice and volume calculator.

617 **Statistical analysis.** Statistical analyses – excluding scRNAseq experiments – are presented as  
618 mean±SEM unless otherwise indicated. Two groups were compared using an unpaired *t*-test.  
619 Statistical tests were performed on the online platform socscstatistics.com. Significance was defined  
620 as \**p* ≤ 0.05, \*\**p* ≤ 0.01, \*\*\**p* ≤ 0.001.

621 **Data and CODE availability.** The RNAseq data generated during this study are available at the GEO  
622 database with project number GEO: GSE153282. The mass spectrometry data have been deposited to  
623 the ProteomeXchange Consortium via the PRIDE database with the dataset identifier PXD019521.



624

625

## References

- 626 1 Lozano, R. *et al.* Global and regional mortality from 235 causes of death for 20 age groups in  
627 1990 and 2010: a systematic analysis for the Global Burden of Disease Study 2010. *Lancet*  
628 **380**, 2095-2128, doi:10.1016/S0140-6736(12)61728-0 (2012).
- 629 2 Tzahor, E. & Poss, K. D. Cardiac regeneration strategies: Staying young at heart. *Science* **356**,  
630 1035-1039, doi:10.1126/science.aam5894 (2017).
- 631 3 Bergmann, O. *et al.* Dynamics of Cell Generation and Turnover in the Human Heart. *Cell* **161**,  
632 1566-1575, doi:10.1016/j.cell.2015.05.026 (2015).
- 633 4 Papait, R. *et al.* Histone Methyltransferase G9a Is Required for Cardiomyocyte Homeostasis  
634 and Hypertrophy. *Circulation* **136**, 1233-1246, doi:10.1161/CIRCULATIONAHA.117.028561  
635 (2017).
- 636 5 Travers, J. G., Kamal, F. A., Robbins, J., Yutzey, K. E. & Blaxall, B. C. Cardiac Fibrosis: The  
637 Fibroblast Awakens. *Circ Res* **118**, 1021-1040, doi:10.1161/CIRCRESAHA.115.306565  
638 (2016).
- 639 6 Fang, L., Murphy, A. J. & Dart, A. M. A Clinical Perspective of Anti-Fibrotic Therapies for  
640 Cardiovascular Disease. *Front Pharmacol* **8**, 186, doi:10.3389/fphar.2017.00186 (2017).
- 641 7 Porrello, E. R. *et al.* Transient regenerative potential of the neonatal mouse heart. *Science* **331**,  
642 1078-1080, doi:10.1126/science.1200708 (2011).
- 643 8 Hnatiuk, A. & Mercola, M. Stars in the Night Sky: iPSC-Cardiomyocytes Return the Patient  
644 Context to Drug Screening. *Cell Stem Cell* **24**, 506-507, doi:10.1016/j.stem.2019.03.013  
645 (2019).
- 646 9 Desgres, M. & Menasche, P. Clinical Translation of Pluripotent Stem Cell Therapies:  
647 Challenges and Considerations. *Cell Stem Cell* **25**, 594-606, doi:10.1016/j.stem.2019.10.001  
648 (2019).
- 649 10 Shi, Y., Inoue, H., Wu, J. C. & Yamanaka, S. Induced pluripotent stem cell technology: a  
650 decade of progress. *Nat. Rev. Drug Discov.* **16**, 115-130, doi:10.1038/nrd.2016.245 (2017).
- 651 11 Smart, N. *et al.* De novo cardiomyocytes from within the activated adult heart after injury.  
652 *Nature* **474**, 640-644, doi:10.1038/nature10188 (2011).
- 653 12 Gabisonia, K. *et al.* MicroRNA therapy stimulates uncontrolled cardiac repair after myocardial  
654 infarction in pigs. *Nature* **569**, 418-422, doi:10.1038/s41586-019-1191-6 (2019).
- 655 13 Wei, K. *et al.* Epicardial FSTL1 reconstitution regenerates the adult mammalian heart. *Nature*  
656 **525**, 479-485, doi:10.1038/nature15372 (2015).
- 657 14 Bassat, E. *et al.* The extracellular matrix protein agrin promotes heart regeneration in mice.  
658 *Nature* **547**, 179-184, doi:10.1038/nature22978 (2017).
- 659 15 Monroe, T. O. *et al.* YAP Partially Reprograms Chromatin Accessibility to Directly Induce  
660 Adult Cardiogenesis In Vivo. *Dev. Cell* **48**, 765-779 e767, doi:10.1016/j.devcel.2019.01.017  
661 (2019).
- 662 16 Srivastava, D. & DeWitt, N. In Vivo Cellular Reprogramming: The Next Generation. *Cell* **166**,  
663 1386-1396, doi:10.1016/j.cell.2016.08.055 (2016).
- 664 17 Chong, J. J. *et al.* Human embryonic-stem-cell-derived cardiomyocytes regenerate non-human  
665 primate hearts. *Nature* **510**, 273-277, doi:10.1038/nature13233 (2014).
- 666 18 Menasche, P. *et al.* Transplantation of Human Embryonic Stem Cell-Derived Cardiovascular  
667 Progenitors for Severe Ischemic Left Ventricular Dysfunction. *J Am Coll Cardiol* **71**, 429-438,  
668 doi:10.1016/j.jacc.2017.11.047 (2018).
- 669 19 Chien, K. R. *et al.* Regenerating the field of cardiovascular cell therapy. *Nat Biotechnol* **37**,  
670 232-237, doi:10.1038/s41587-019-0042-1 (2019).

- 671 20 Sadek, H. & Olson, E. N. Toward the Goal of Human Heart Regeneration. *Cell Stem Cell* **26**,  
672 7-16, doi:10.1016/j.stem.2019.12.004 (2020).
- 673 21 Vagnozzi, R. J. *et al.* An acute immune response underlies the benefit of cardiac stem cell  
674 therapy. *Nature* **577**, 405-409, doi:10.1038/s41586-019-1802-2 (2020).
- 675 22 Eschenhagen, T. *et al.* Cardiomyocyte Regeneration: A Consensus Statement. *Circulation* **136**,  
676 680-686, doi:10.1161/CIRCULATIONAHA.117.029343 (2017).
- 677 23 Brade, T., Pane, L. S., Moretti, A., Chien, K. R. & Laugwitz, K. L. Embryonic heart  
678 progenitors and cardiogenesis. *Cold Spring Harbor perspectives in medicine* **3**, a013847,  
679 doi:10.1101/cshperspect.a013847 (2013).
- 680 24 Sahara, M., Santoro, F. & Chien, K. R. Programming and reprogramming a human heart cell.  
681 *EMBO J* **34**, 710-738, doi:10.15252/embj.201490563 (2015).
- 682 25 Moretti, A. *et al.* Multipotent embryonic isl1+ progenitor cells lead to cardiac, smooth muscle,  
683 and endothelial cell diversification. *Cell* **127**, 1151-1165 (2006).
- 684 26 Spater, D. *et al.* A HCN4+ cardiomyogenic progenitor derived from the first heart field and  
685 human pluripotent stem cells. *Nat Cell Biol* **15**, 1098-1106, doi:10.1038/ncb2824 (2013).
- 686 27 Liang, X. *et al.* HCN4 dynamically marks the first heart field and conduction system  
687 precursors. *Circulation Research* **113**, 399-407, doi:10.1161/CIRCRESAHA.113.301588  
688 (2013).
- 689 28 Foo, K. S. *et al.* Human ISL1(+) Ventricular Progenitors Self-Assemble into an In Vivo  
690 Functional Heart Patch and Preserve Cardiac Function Post Infarction. *Mol Ther* **26**, 1644-  
691 1659, doi:10.1016/j.ymthe.2018.02.012 (2018).
- 692 29 Fischer, C. *et al.* Long-term functional and structural preservation of precision-cut human  
693 myocardium under continuous electromechanical stimulation in vitro. *Nat Commun* **10**, 117,  
694 doi:10.1038/s41467-018-08003-1 (2019).
- 695 30 Bu, L. *et al.* Human ISL1 heart progenitors generate diverse multipotent cardiovascular cell  
696 lineages. *Nature* **460**, 113-117 (2009).
- 697 31 Sahara, M. *et al.* Population and Single-Cell Analysis of Human Cardiogenesis Reveals  
698 Unique LGR5 Ventricular Progenitors in Embryonic Outflow Tract. *Dev. Cell* **48**, 475-490  
699 e477, doi:10.1016/j.devcel.2019.01.005 (2019).
- 700 32 Lescroart, F. *et al.* Defining the earliest step of cardiovascular lineage segregation by single-  
701 cell RNA-seq. *Science* **359**, 1177-1181, doi:10.1126/science.aao4174 (2018).
- 702 33 Trapnell, C. *et al.* The dynamics and regulators of cell fate decisions are revealed by  
703 pseudotemporal ordering of single cells. *Nat Biotechnol* **32**, 381-386, doi:10.1038/nbt.2859  
704 (2014).
- 705 34 Wang, L. *et al.* Single-cell reconstruction of the adult human heart during heart failure and  
706 recovery reveals the cellular landscape underlying cardiac function. *Nat Cell Biol* **22**, 108-119,  
707 doi:10.1038/s41556-019-0446-7 (2020).
- 708 35 Brule, S. *et al.* The shedding of syndecan-4 and syndecan-1 from HeLa cells and human  
709 primary macrophages is accelerated by SDF-1/CXCL12 and mediated by the matrix  
710 metalloproteinase-9. *Glycobiology* **16**, 488-501, doi:10.1093/glycob/cwj098 (2006).
- 711 36 Xiong, H. *et al.* Single-Cell Transcriptomics Reveals Chemotaxis-Mediated Intraorgan  
712 Crosstalk During Cardiogenesis. *Circ Res* **125**, 398-410,  
713 doi:10.1161/CIRCRESAHA.119.315243 (2019).
- 714 37 Gonzalez-Rosa, J. M., Martin, V., Peralta, M., Torres, M. & Mercader, N. Extensive scar  
715 formation and regression during heart regeneration after cryoinjury in zebrafish. *Development*  
716 **138**, 1663-1674, doi:10.1242/dev.060897 (2011).
- 717 38 Nguyen Ba-Charvet, K. T. *et al.* Diversity and specificity of actions of Slit2 proteolytic  
718 fragments in axon guidance. *J Neurosci* **21**, 4281-4289 (2001).

- 719 39 Bahr, A. *et al.* Ubiquitous LEA29Y Expression Blocks T Cell Co-Stimulation but Permits  
720 Sexual Reproduction in Genetically Modified Pigs. *PLoS One* **11**, e0155676,  
721 doi:10.1371/journal.pone.0155676 (2016).
- 722 40 Shiba, Y. *et al.* Allogeneic transplantation of iPS cell-derived cardiomyocytes regenerates  
723 primate hearts. *Nature* **538**, 388-391, doi:10.1038/nature19815 (2016).
- 724 41 Romagnuolo, R. *et al.* Human Embryonic Stem Cell-Derived Cardiomyocytes Regenerate the  
725 Infarcted Pig Heart but Induce Ventricular Tachyarrhythmias. *Stem Cell Reports* **12**, 967-981,  
726 doi:10.1016/j.stemcr.2019.04.005 (2019).
- 727 42 Elliott, D. A. *et al.* NKX2-5(eGFP/w) hESCs for isolation of human cardiac progenitors and  
728 cardiomyocytes. *Nat Methods* **8**, 1037-1040, doi:10.1038/nmeth.1740 (2011).
- 729 43 Fischer, B. *et al.* A complete workflow for the differentiation and the dissociation of hiPSC-  
730 derived cardiospheres. *Stem Cell Res* **32**, 65-72, doi:10.1016/j.scr.2018.08.015 (2018).
- 731 44 Satija, R., Farrell, J. A., Gennert, D., Schier, A. F. & Regev, A. Spatial reconstruction of  
732 single-cell gene expression data. *Nat. Biotechnol.* **33**, 495-502, doi:10.1038/nbt.3192 (2015).
- 733 45 Qiu, X. *et al.* Single-cell mRNA quantification and differential analysis with Census. *Nat*  
734 *Methods* **14**, 309-315, doi:10.1038/nmeth.4150 (2017).
- 735 46 Yu, G., Wang, L. G., Han, Y. & He, Q. Y. clusterProfiler: an R package for comparing  
736 biological themes among gene clusters. *OMICS* **16**, 284-287, doi:10.1089/omi.2011.0118  
737 (2012).
- 738 47 Tinevez, J. Y. *et al.* TrackMate: An open and extensible platform for single-particle tracking.  
739 *Methods* **115**, 80-90, doi:10.1016/j.ymeth.2016.09.016 (2017).
- 740 48 Rappsilber, J., Mann, M. & Ishihama, Y. Protocol for micro-purification, enrichment, pre-  
741 fractionation and storage of peptides for proteomics using StageTips. *Nat Protoc* **2**, 1896-  
742 1906, doi:10.1038/nprot.2007.261 (2007).
- 743 49 Rappsilber, J. & Mann, M. Analysis of the topology of protein complexes using cross-linking  
744 and mass spectrometry. *CSH Protoc* **2007**, pdb prot4594, doi:10.1101/pdb.prot4594 (2007).
- 745 50 Laria, A. E. *et al.* Secretome Analysis of Hypoxia-Induced 3T3-L1 Adipocytes Uncovers  
746 Novel Proteins Potentially Involved in Obesity. *Proteomics* **18**, e1700260,  
747 doi:10.1002/pmic.201700260 (2018).
- 748
- 749

750

751

## 752 **Acknowledgements**

753 We thank Drs. Rabea Hinkel (Deutsches Primatenzentrum Göttingen), Mats Spångberg, Bengt  
754 Eriksson, Astrid Fagreaus, and Pia Ekeland (Karoliska Institute), as well as Jan-Michael Abicht and  
755 Matthias Längin (Walter Brendel Centre of Experimental Medicine, LMU) for providing NHP hearts,  
756 Dr. David Elliott for his generosity of the two NKX2.5-eGFP cell lines, Dr. Alexander Goedel, Dr.  
757 Ran Yang, and Dr. Xidan Li for FACS and bioinformatics assistance, and Dr. Steffen Dietzel (Core  
758 Facility Bioimaging, Biomedical Center, LMU) for 2-Photon live microscopy. We would like to  
759 acknowledge Birgit Campbell and Christina Scherb for their technical assistance in cell culture and  
760 Sarah Luger (moments-of-aha.com) for graphic illustrations. This work was supported by grants from:  
761 the European Research Council, ERC 743225 (to K.R.C.) and ERC 788381 (to A.M.); the German  
762 Research Foundation, Transregio Research Unit 152 (to A.M., K-L.L.) and 267 (to A.M., K-L.L., and  
763 C.K.); Swedish Research Council Distinguish Professor Grant (to K.R.C.); DZHK (German Centre for  
764 Cardiovascular Research).

765

## 766 **Author contributions**

767 K-L.L., A.Mo., and K.R.C. together setup the collaboration and conceived the overall experimental  
768 plan. C.S. and M.T.D.A. performed functional experiments and histochemistry, analysed data, and  
769 generated figures. K.S.F. produced HVPs and CMs, performed MACS sorting, and analysed data.  
770 C.S., M.T.D.A., and K.S.F. contributed to the conception and design of experiments. G.S. performed  
771 bioinformatics analyses. F.R. and P.H. established RFA and measured scar parameters. T.D.  
772 conducted FACS analysis. T.D., I.M., and A.Me. produced heart slices and performed cellular  
773 seeding. Y.L.T. contributed to bioinformatics. S.S. developed cellular bioprinting. K.L., R.T., and  
774 A.D. introduced and adapted biomimetic slice culture. D.S. conducted calcium imaging and analysis  
775 and analysed time-lapse. E.P., M.G., and G.C. executed mass spectrometry. A.B., N.H., M.K., and  
776 C.K. performed *in vivo* pig experiments. M.K. injected HVPs *in vivo*. V.J. performed CD68  
777 immunodetection and analysis. N.K. generated and provided transgenic LEA29Y pigs. N.K., C.K. and  
778 A.B. supervised *in vivo* studies and provided conceptual advice. A.Mo., K.R.C., and K.-L.L.  
779 conceived and supervised this study and provided financial support. A.Mo., K.R.C., and K.-L.L. wrote  
780 the manuscript. All authors commented on and edited the manuscript.

781

782

783 **Competing interests statement**

784 The authors declare that they have no competing financial interests. K.S.F. and K.R.C. are co-  
785 inventors on a patent based on the HVP technology and its applications. The HVP intellectual  
786 property is assigned to SWIBCO, a Swedish holding company.

787

788



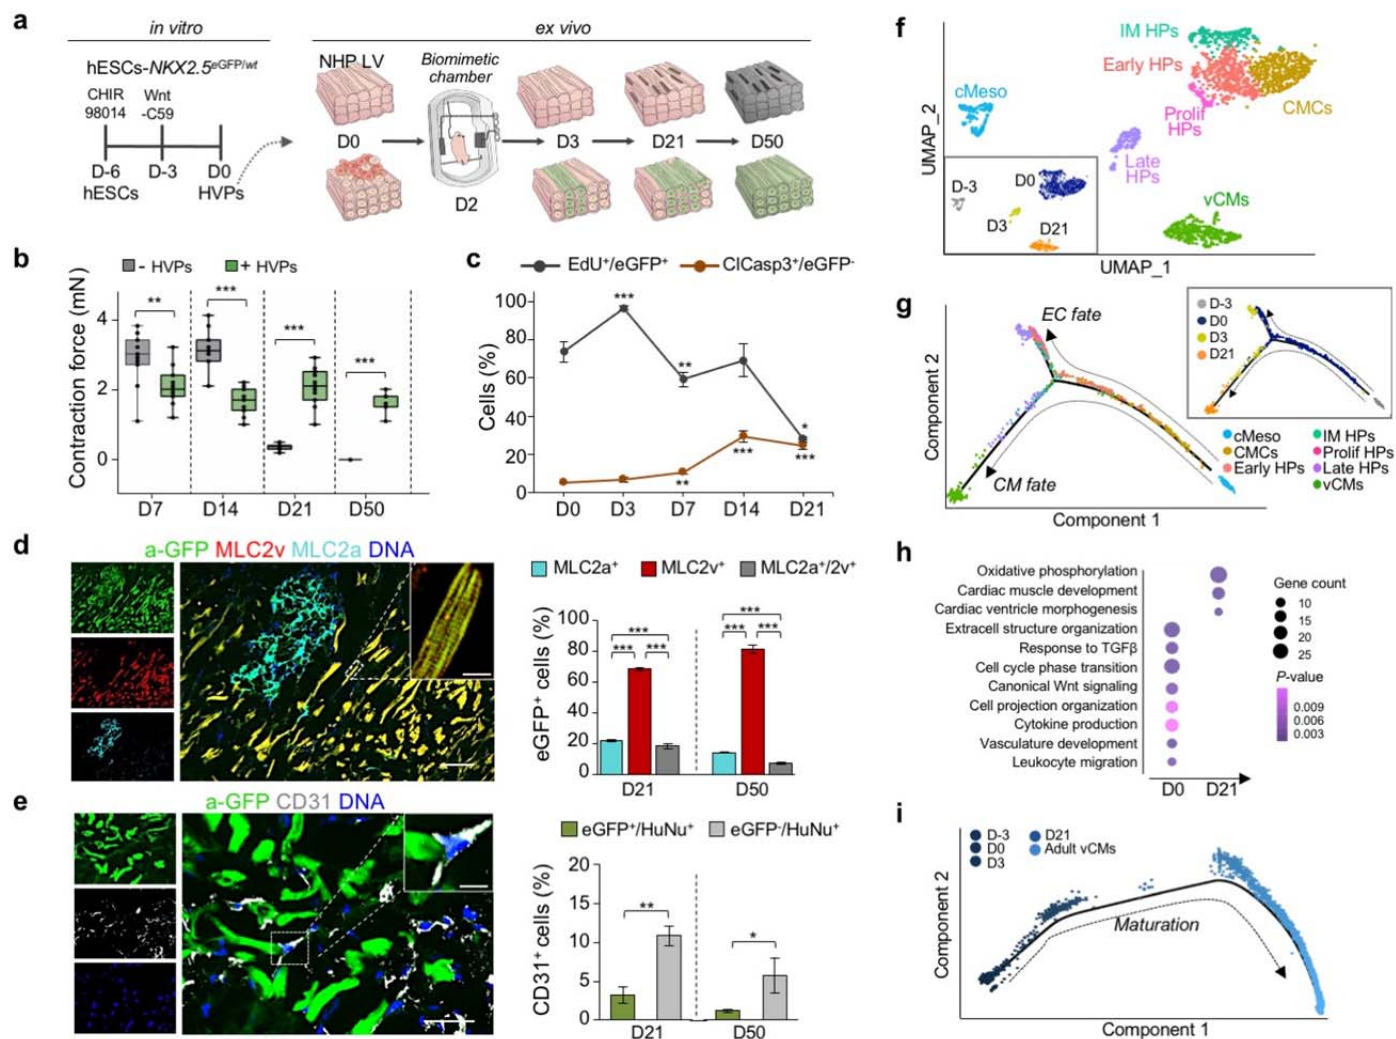

789

790 **Figure 1. HVPs expand, repopulate and functionally mature in an *ex vivo* 3D NHP heart**  
 791 **model.** **a**, Schematic of the experimental setup for *in vitro* differentiation of HVPs from *NKX2-5<sup>eGFP/wt</sup>*  
 792 hESCs (left) and their *ex vivo* co-culture with native NHP LV slices in biomimetic chambers (right).  
 793 **b**, Contractile force of *ex vivo* cultured NHP heart slices with and without HVPs on indicated days (D)  
 794 of co-culture. Box plot shows all data points as well as the median and quartiles; n = 11 patches/time  
 795 point; \*\*p<0.005, \*\*\*p<0.001 (t-test). **c**, Percentage of EdU<sup>+</sup>/eGFP<sup>+</sup> and ClCasp3<sup>+</sup>/eGFP<sup>+</sup> cells during  
 796 co-culture. Data are mean ± SEM; n ≥ 3 samples/time point; \*p<0.05, \*\*p<0.005, \*\*\*p<0.001 vs D0  
 797 (t-test). **d, e**, Left, representative immunofluorescence images of D50 chimeric human-NHP heart  
 798 constructs using an antibody against GFP (a-GFP) together with antibodies for MLC2a and MLC2v  
 799 (d) or CD31 (e). Scale bar 100 μm in d, 50 μm in e, 10 μm in insets. Right, percentage of eGFP<sup>+</sup>  
 800 cells expressing MLC2v, MLC2a, or both (d) and human cells expressing CD31 (e) on D21 and D50.  
 801 HuNu, human nuclear antigen. Data are mean ± SEM; n = 4 samples/time point; \*\*p<0.005,  
 802 \*\*\*p<0.001 (t-test). **f**, UMAP clustering of single cells captured on D-3 and D0 of *in vitro*  
 803 differentiation together with D3 and D21 of *ex vivo* co-culture. cMeso, cardiac mesoderm; CMCs,  
 804 cardiac mesenchymal cells; Early HPs, early heart progenitors; IM HPs, intermediate heart  
 805 progenitors; Late HPs, late heart progenitors; vCMs, ventricular cardiomyocytes. **g**, Developmental  
 806 trajectory analysis of captured cells coloured by population identity and time of collection. EC,



807 endothelial cell. **h**, Representative GO terms upregulated during *ex vivo* co-culture. **i**, Pseudotime  
808 trajectory of captured cells combined with adult vCMs from Wang *et al.* 2020. Colour gradient (from  
809 dark to light) according to maturation.  
810

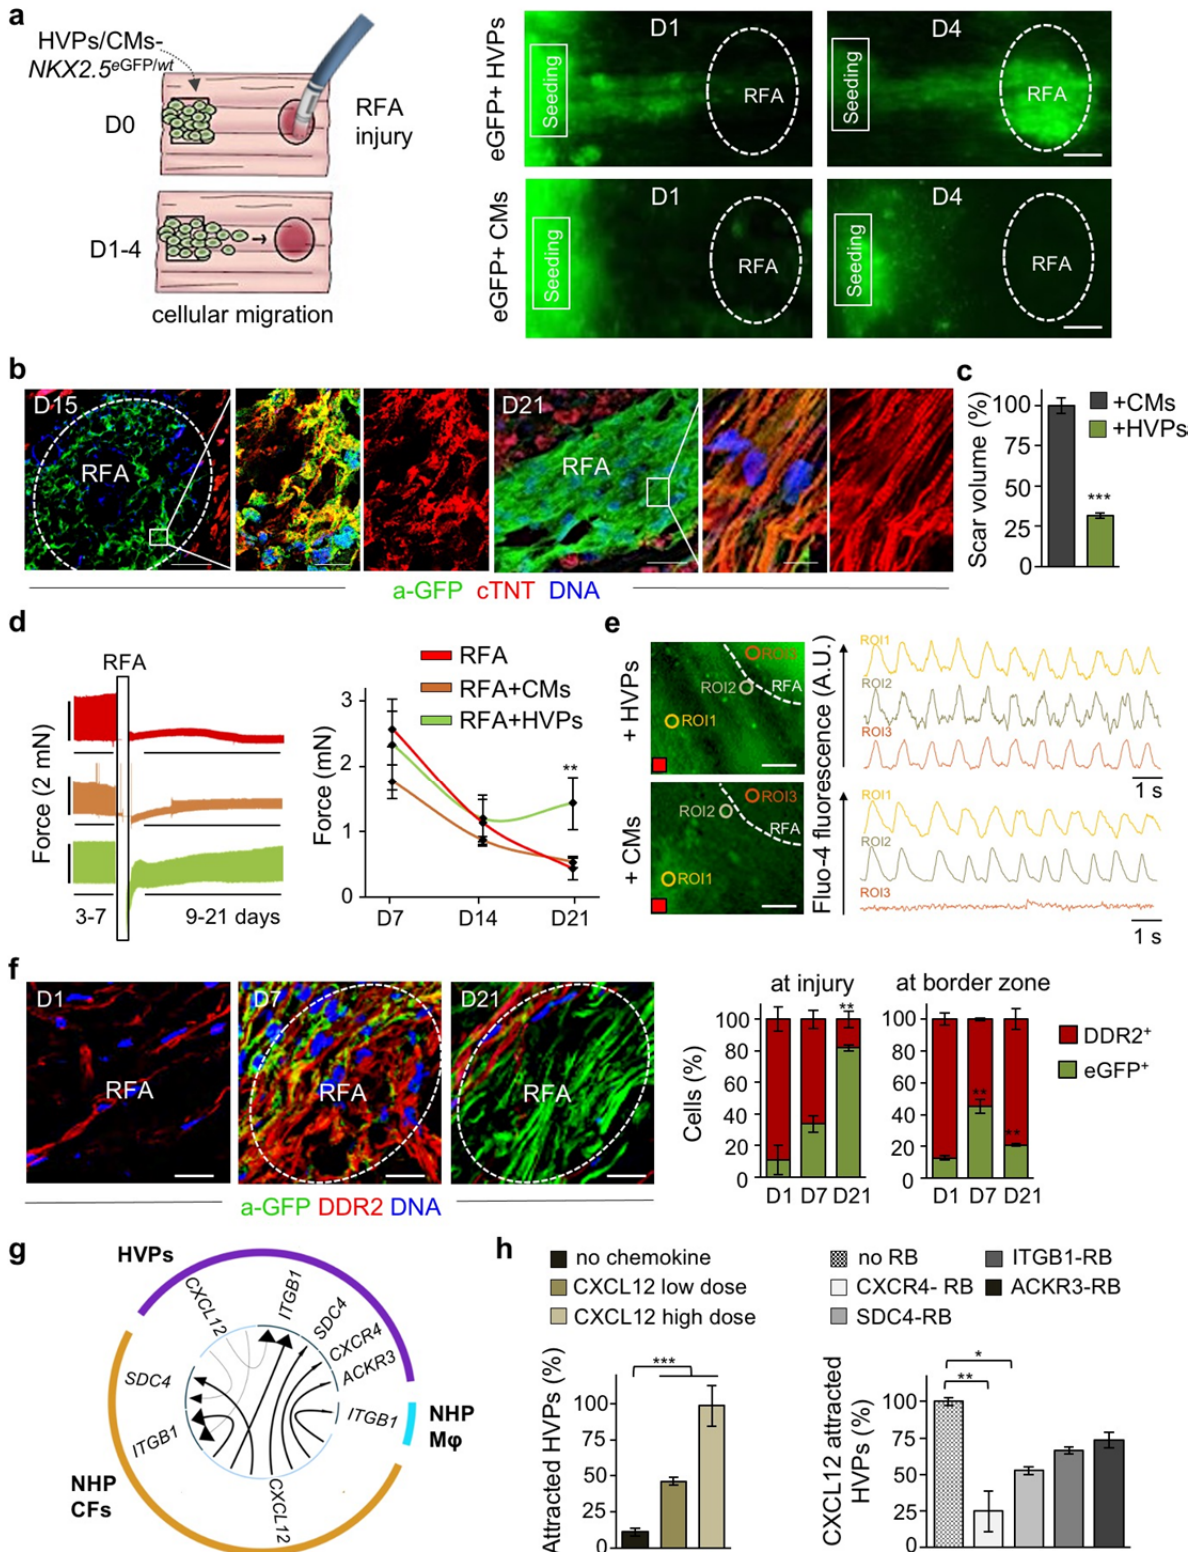

811

812 **Figure 2. HVPs are chemoattracted to sites of cardiac injury via CXCL12/CXCR4**  
 813 **signalling and remuscularize the scar. a, Left, schematic of experimental design for selective**  
 814 **seeding of *NKX2-5<sup>eGFP/wt</sup>* hESC-derived HVPs or CMs onto bioprinted pluronic frame on NHP heart**

815 slices and standardized radiofrequency-ablation (RFA) injury on the opposite tissue site. Right,  
816 sequential live-imaging of eGFP signal at indicated days. Scale bars 200  $\mu\text{m}$ . **b**, Representative  
817 immunostaining of eGFP and cardiac troponin T (cTNT) in NHP constructs on D15 and D21 after  
818 RFA. Magnifications of the framed areas are shown in adjacent panels. Scale bar 200  $\mu\text{m}$  for D15,  
819 100  $\mu\text{m}$  for D21, 10  $\mu\text{m}$  for magnifications. **c**, Statistical analysis of relative reduction of scar volume  
820 with HVPs compared to CMs on D21.  $n=2$  patches per group,  $\geq 28$  z-stack images/patch. **d**, Left,  
821 Representative recordings of contractile force before and after RFA, separated by a blanking period of  
822 2 days for re-adjustment of preload (left) and corresponding statistical analysis (right).  $n=3$   
823 samples/condition. **e**, Representative images of Fluo-4 loaded NHP-HVP and -CM constructs (left)  
824 and corresponding  $\text{Ca}^{2+}$  transients at indicated regions of interest (ROI) (right). Scale bar 100  $\mu\text{m}$ . Red  
825 box indicate stimulation point (1Hz). **f**, Left, representative immunostaining of eGFP and DDR2 in  
826 NHP constructs at indicated days after RFA. Scale bars 200  $\mu\text{m}$ . Right, percentage of eGFP<sup>+</sup> and  
827 DDR2<sup>+</sup> cells at RFA injury or border zone;  $n=3$  samples/time point. **g**, Circos plot for ligand-receptor  
828 pairing showing top ten interactions identified in scRNAseq of NHP-HVP constructs at 24 and 48  
829 hours after RFA injury and HVP application. Fraction of expressing cells and link direction  
830 (chemokine to receptor) are indicated. M $\phi$ , macrophages. **h**, Percentage of chemoattracted HVPs in  
831 trans-well migration assays in absence and presence of low (20 ng/ml) or high (80 ng/ml) dose of  
832 CXCL12 (left) or after addition of the indicated receptor blockers (right).  $n=3$  samples/condition. All  
833 data are indicated as mean  $\pm$  SEM; \*\* $p<0.05$ , \*\* $p<0.005$ , \*\*\* $p<0.001$  ( $t$ -test).  
834

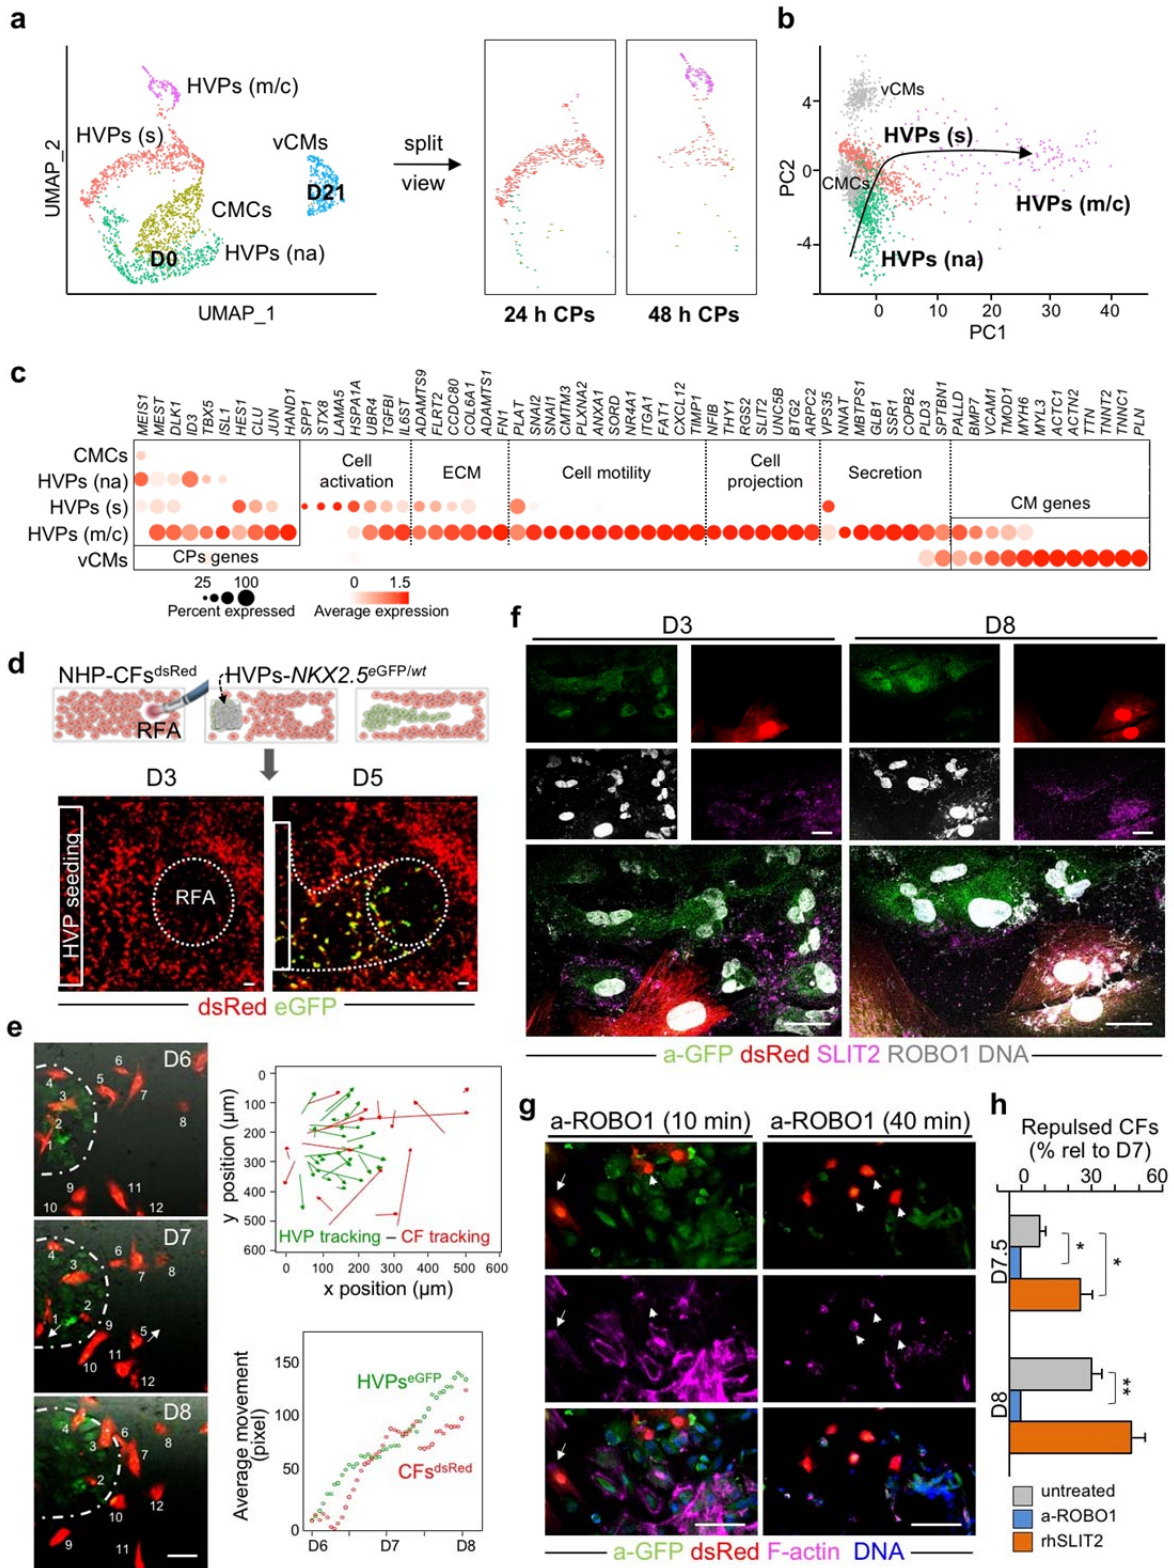

835

836 **Figure 3. SLIT2/ROBO1 signalling mediates activated CF repulsion and prevents**  
 837 **myocardial scarring.** **a**, Twenty-four and 48 hours human scRNAseq datasets are integrated with D0  
 838 and D21 CM dataset and projected onto UMAP plots, coloured by cluster assignment and annotated



839 post hoc. Both the aligned (left) and split (right) views are shown. CMCs, cardiac mesenchymal cells;  
840 HVPs (na), non-activated; HVPs (s), sensing; HVPs (m/c), migrating and counteracting; vCMs,  
841 ventricle cardiomyocytes. **b**, PCA plot of different cell clusters, with the principal curve indicating the  
842 pathway of injury response. **c**, Dot plot showing gene signature shifts among different dynamic  
843 cellular states. The shadings denote average expression and the size of dots the fractional expression.  
844 **d**, Top, schematic of 2D model for RFA injury of NHP-CFs expressing dsRed followed by *NKX2-*  
845 *5<sup>eGFP/wt</sup>* HVP seeding and monitoring of co-culture. Bottom, sequential live imaging of dsRed<sup>+</sup> and  
846 eGFP<sup>+</sup> cells during migration. Scale bars 200  $\mu$ m. **e**, Left, representative time-lapse images of dsRed<sup>+</sup>  
847 and eGFP<sup>+</sup> cells at the RFA injury site during CF repulsion on indicated days. Dotted line delineates  
848 HVP migration front. Scale bar 100  $\mu$ m. Right, cell tracking over time (top) and average movement  
849 (bottom) analysis of HVPs and CFs. **f**, Representative immunostaining for eGFP, SLIT2, and ROBO1  
850 on D3 and D8. Scale bars 25  $\mu$ m. **g**, F-actin and eGFP immunofluorescence an D8 after ROBO1  
851 antibody exposure for 10 and 40 minutes. Change of CF shape (arrow head) and F-actin localized on  
852 protrusion side of CFs (arrow). Scale bars 75  $\mu$ m. **h**, Percentage of repulsed CFs at the injured site  
853 analyzed on D7.5 and D8 in standard condition (untreated) or after ROBO1 antibody and rhSLIT2  
854 treatment on D7. Data are normalized to D7 and presented as mean  $\pm$  SEM, n=3. \* $p$ <0.05, \*\* $p$ <0.005  
855 vs untreated (*t*-test).  
856

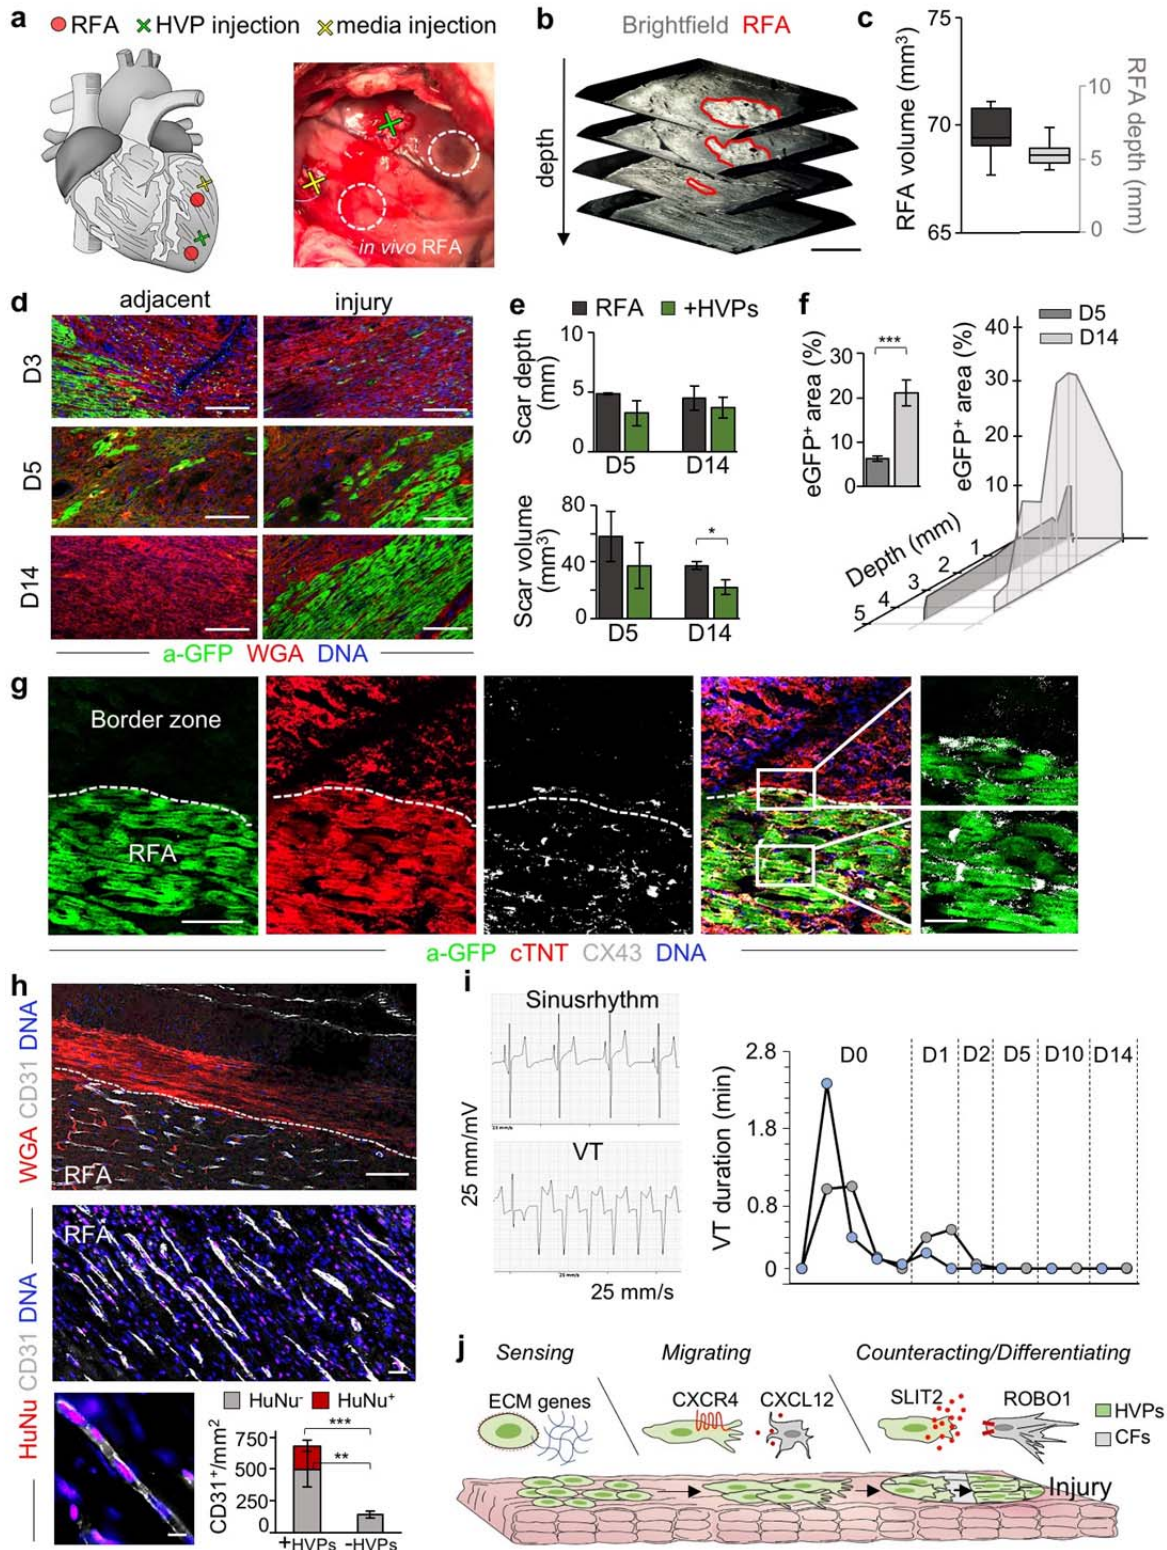

857

858 **Figure 4. HVPs directly migrate towards the damaged myocardium and remuscularize the**  
 859 **injured tissue without arrhythmias in a transgenic LEA29Y porcine model *in vivo*.** **a**, Schematic  
 860 of *in vivo* experimental design depicting 2 left ventricular RFA injuries and adjacent injection of



861 HVPs or cell-free media. **b, c**, Representative 3D reconstruction of non-transmural RFA injury (**b**,  
862 scale bar 2 mm) and statistical analysis of scar volume and depth of RFA injuries in freshly explanted  
863 wild-type pig hearts indicating standardized injury size (**c**). The median and quartiles are shown; n=3.  
864 **d**, Representative fluorescence images of injury and adjacent sites after WGA and anti-GFP (a-GFP)  
865 co-staining on D3, D5 and D14. Scale bars 100  $\mu\text{m}$ . **e**, Quantification of *in vivo* scar depth and volume  
866 on D5 and D14 with or without HVP injections. **f**, Percentage of eGFP<sup>+</sup> area within the RFA injury  
867 (left) and according to depth of the cutting plane. **g**, Representative immunostaining of eGFP, cTNT,  
868 and CX43 in RFA and border zone on D14. Magnifications on the right correspond to the boxed area  
869 in the merge image. Scale bar 50  $\mu\text{m}$  and 10  $\mu\text{m}$  (magnifications). **h**, Representative fluorescence  
870 images of HVP-treated RFA injury site after immunostaining for CD31 in combination with WGA  
871 (top) or with anti-human nuclei (HuNu, middle and bottom). Scale bar 50  $\mu\text{m}$  top, 25  $\mu\text{m}$  middle, 10  
872  $\mu\text{m}$  bottom. Bar graph shows the average number of CD31<sup>+</sup> cells/mm<sup>2</sup> cells derived from host (HuNu<sup>-</sup>)  
873 or human progenitors (HuNu<sup>+</sup>) in HVP-treated and untreated RFAs. **i**, Eventrecorder readout with  
874 representative ECG traces of sinus rhythm (top) and degeneration to ventricular tachycardia (VT,  
875 bottom). Right, occurrence and duration of VTs at the indicated days after transplantation. n=2  
876 eventrecorder traces. **j**. Scheme depicting the identified dynamical cellular states of human HVPs  
877 during tissue heart repair and the involved signalling pathways. Data in **e, f**, and **h** are mean  $\pm$  SEM,  
878 n=2 per group. \* p<0.05, \*\*p<0.005, \*\*\*p<0.001 (*t*-test).  
879

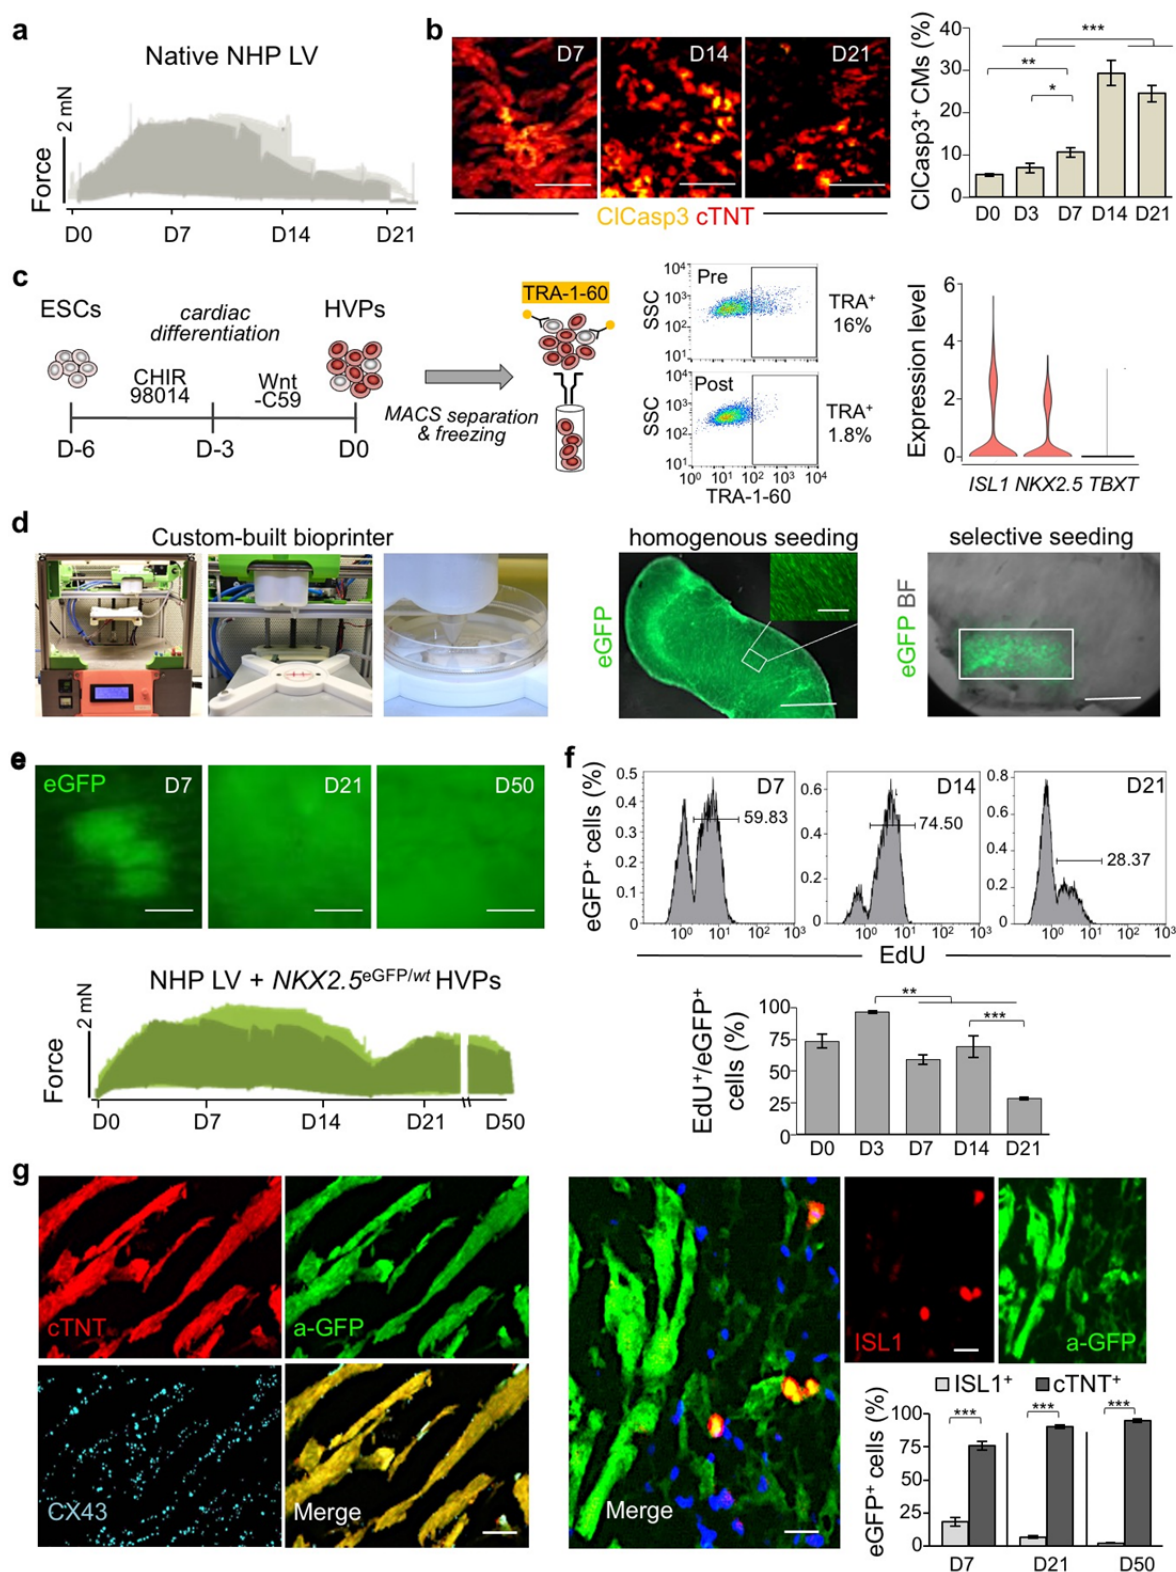

880

881 **Extended Data Figure 1. Generation and analysis of an *ex vivo* 3D chimeric human-NHP**  
 882 **heart model.** **a**, Representative, overlapped traces of contractile force of native NHP heart slices  
 883 cultured *ex vivo* for 21 days in biomimetic chambers. **b**, Representative immunofluorescence images

884 for activated cleaved caspase 3 (ClCasp3) and cardiac troponin T (cTNT) in *ex vivo* cultured NHP  
885 heart slices (left) and correspondent quantification (right) at the indicated days. Scale bars 50  $\mu$ m.  
886  $n \geq 3$  samples/time point. **c**, Schematic of ESC differentiation into HVPs by Wnt pathway modulation  
887 followed by MACS depletion of Tra-1-60<sup>+</sup> cells and cryopreservation until seeding. Single cell  
888 RNAseq confirmed expression of *ISL1* and *NKX2.5* and loss of brachyury T (*TBXT*) on D0. **d**, Left,  
889 custom-built bioprinting device with pneumatic printhead. Right, exemplary images of homogeneous  
890 or selective seeding of eGFP<sup>+</sup> HVPs onto NHP heart slices by bioprinting. Scale bars 250  $\mu$ m, inlet 75  
891  $\mu$ m. **e**, Live eGFP imaging of NHP heart slices after *NKX2-5*<sup>eGFP/wt</sup> HVP seeding at the indicated days  
892 of co-culture (top) and representative contractile force traces (bottom). **f**, Flow cytometry analysis for  
893 EdU in eGFP<sup>+</sup> cells isolated at the indicated days of co-culture.  $n=3$  samples/time point. **g**,  
894 Immunostaining of eGFP in combination with cTNT and Connexin-43 (CX43) (left) or *ISL1* (right)  
895 on D50 of co-culture. Scale bars 25  $\mu$ m. Bar graph shows the percentage of eGFP<sup>+</sup> cells expressing  
896 *ISL1* and cTNT at the indicated days of co-culture.  
897 All statistical data are shown as mean  $\pm$  SEM; \* $p < 0.05$ , \*\* $p < 0.005$ , \*\*\* $p < 0.001$  (*t*-test).  
898



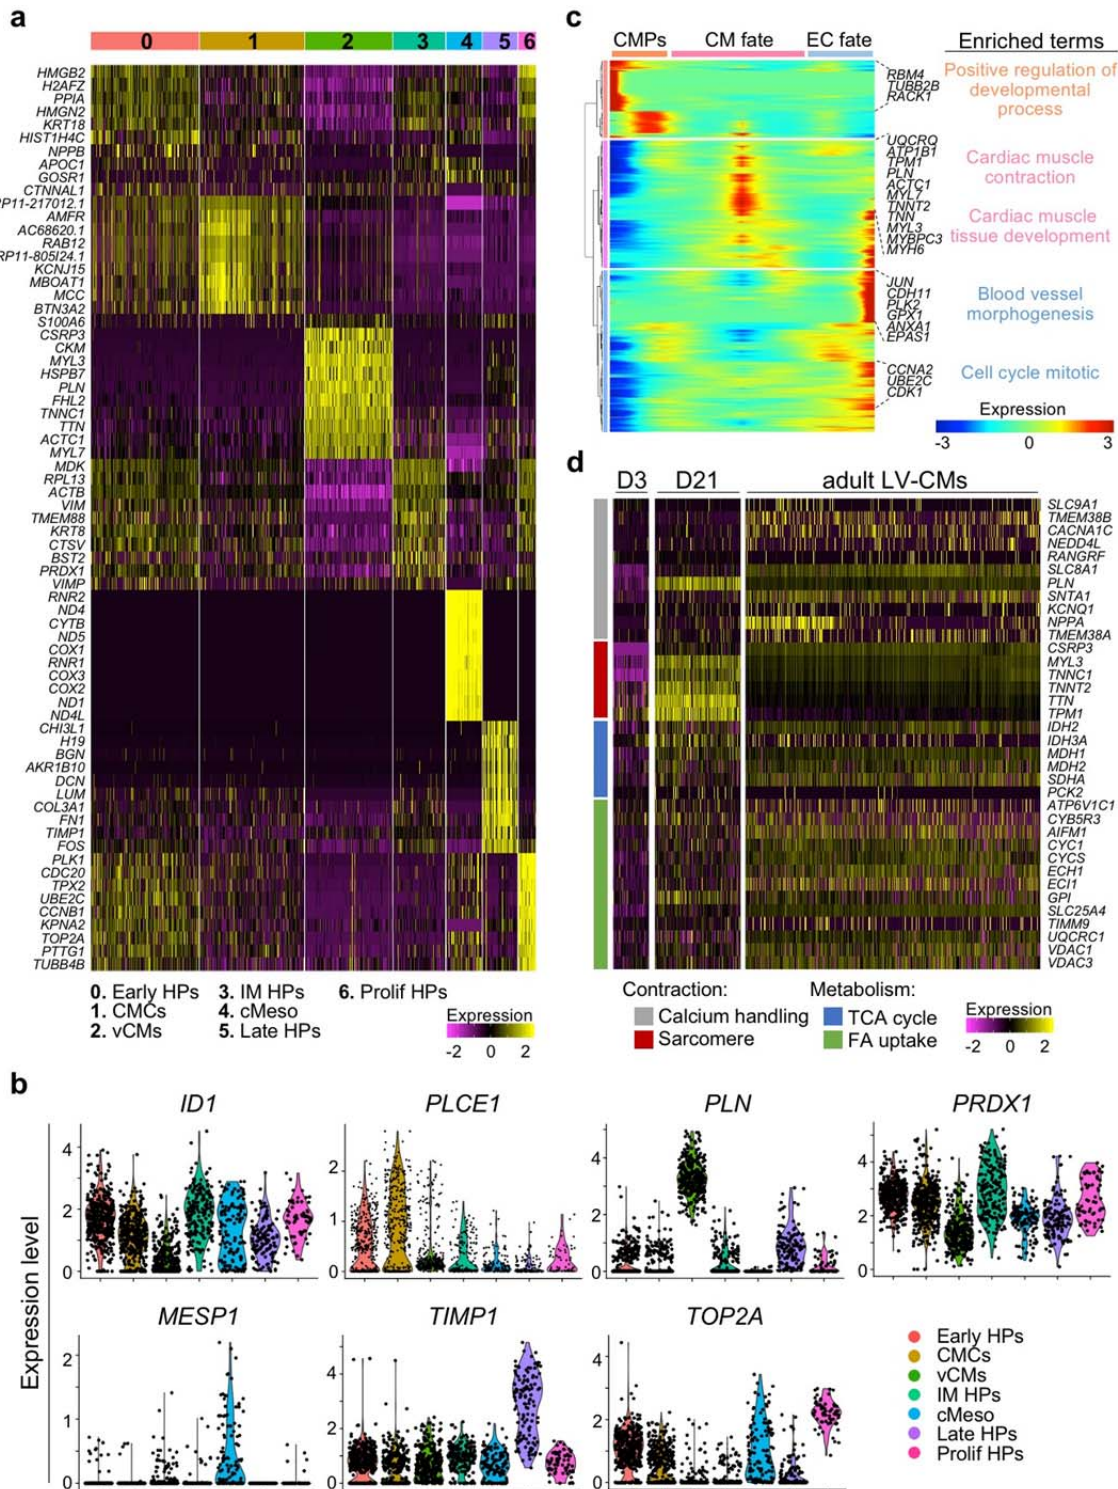

899

900 **Extended Data Figure 2.** scRNAseq analysis of human *NKX2.5<sup>eGFP/wt</sup>* HVPs in a chronic  
 901 injury model of NHP heart slices. **a**, Heatmap showing expression of the top 10 genes in each  
 902 cluster defined as 0- early heart progenitors (Early HPs), 1- cardiac mesenchymal cells (CMCs), 2-

903 ventricular cardiomyocytes (vCMs), 3- intermediate heart progenitors (IM HPs), 4- cardiac  
904 mesodermal cells (cMeso), 5- late heart progenitors (Late HPs), 6- proliferating heart progenitors  
905 (Prolif HPs). **b**, Violin plots of cluster specific marker genes,  $p\text{-value} \leq 0.05$ . **c**, Heatmap of different  
906 blocks of DEGs along the pseudotime trajectory and representative genes in each cluster. Cardiac  
907 mesodermal precursors (CMPs, D-3), endothelial cell (EC) fate (D0 and D3) and CM fate (D21).  
908 Selected top biological process and canonical pathway terms related to corresponding DEGs. **d**,  
909 Heatmap showing the expression of genes related to contraction (gray and red) and metabolism (blue  
910 and orange) in eGFP<sup>+</sup> cells on D3 and D21 of *ex vivo* co-culture compared to adult human LV-CMs  
911 (Wang *et al.*, 2020). Expression levels are presented as a colour code.  
912



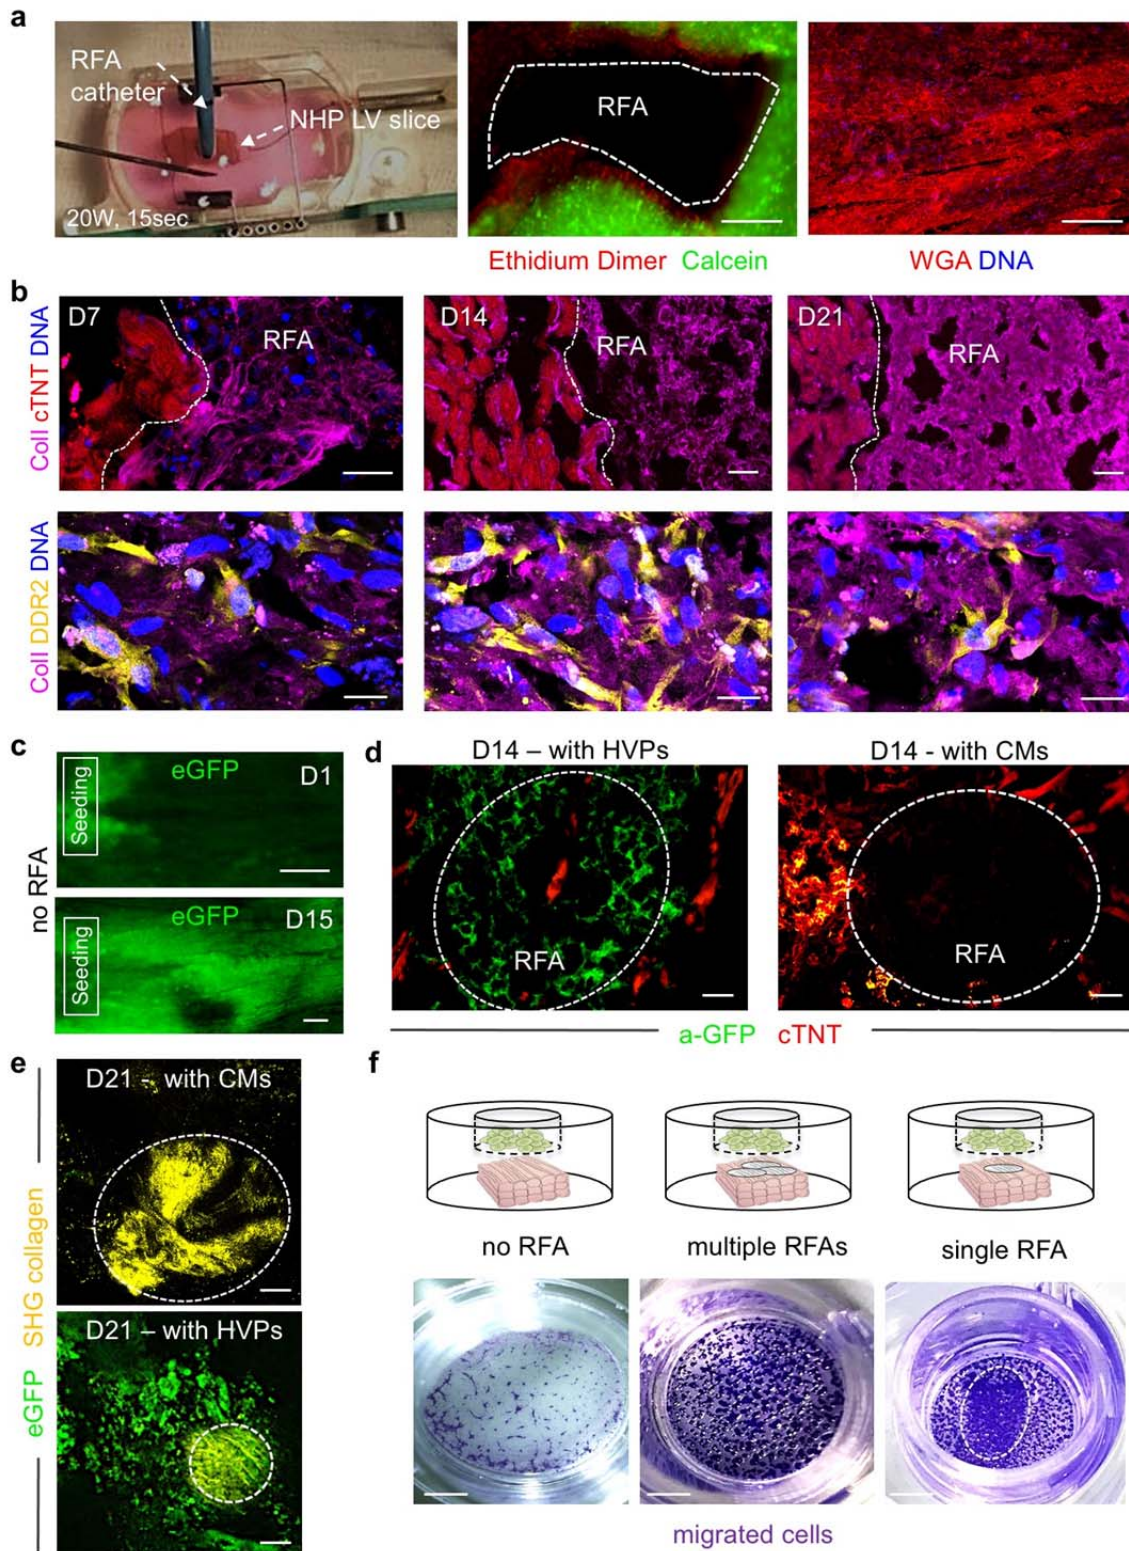

913

914 **Extended Data Figure 3. Generation and analysis of an acute *ex vivo* NHP heart injury**  
 915 **model.** **a**, Standardized non-transmural myocardial injury in NHP heart slices by defined RFA. Live  
 916 and dead cells are stained by calcein and ethidium dimer, respectively (middle). ECM fibers are

917 labeled by WGA (right). Stainings were performed immediately after RFA. Scale bar 200  $\mu\text{m}$ . **b**,  
918 Representative fluorescence images of RFA-injured slices after immunostaining for Collagen type I  
919 (Coll) combined with cTNT (top) or DDR2 (bottom) on indicated days. Lower panels show images of  
920 the RFA area. Scale bars 30  $\mu\text{m}$  (top) and 25  $\mu\text{m}$  (bottom). **c**, Sequential live imaging of *NKX2-*  
921 *5<sup>eGFP/wt</sup>* HVPs migrating from the seeding frame into the tissue showing homogenous repopulation of  
922 the slice by D15 in the absence of RFA injury. Scale bars 200  $\mu\text{m}$ . **d**, Representative immunostaining  
923 of eGFP and cTNT in RFA-injured area on D14 after selective seeding of *NKX2-5<sup>eGFP/wt</sup>* HVPs (left)  
924 or CMs (right). Scale bars 50  $\mu\text{m}$ . **e**, Two-photon live microscopy of RFA-injured slices for eGFP and  
925 second-harmonic-imaging (SHG) visualization of collagen and scar size on D21. Circles demarcate  
926 areas with collagen deposition. Scale bars 100  $\mu\text{m}$ . **f**, Trans-well migration assays with D0 *NKX2-*  
927 *5<sup>eGFP/wt</sup>* HVPs in the upper and NHP heart slice in the lower compartment, respectively. Images show  
928 trans-well migrated HVPs on polycarbonate membrane in the absence (left) or presence of multiple  
929 (middle) or single (right) RFA injury. Dashed line marks the site of HVP accumulation. Scale bars 2  
930 mm.  
931



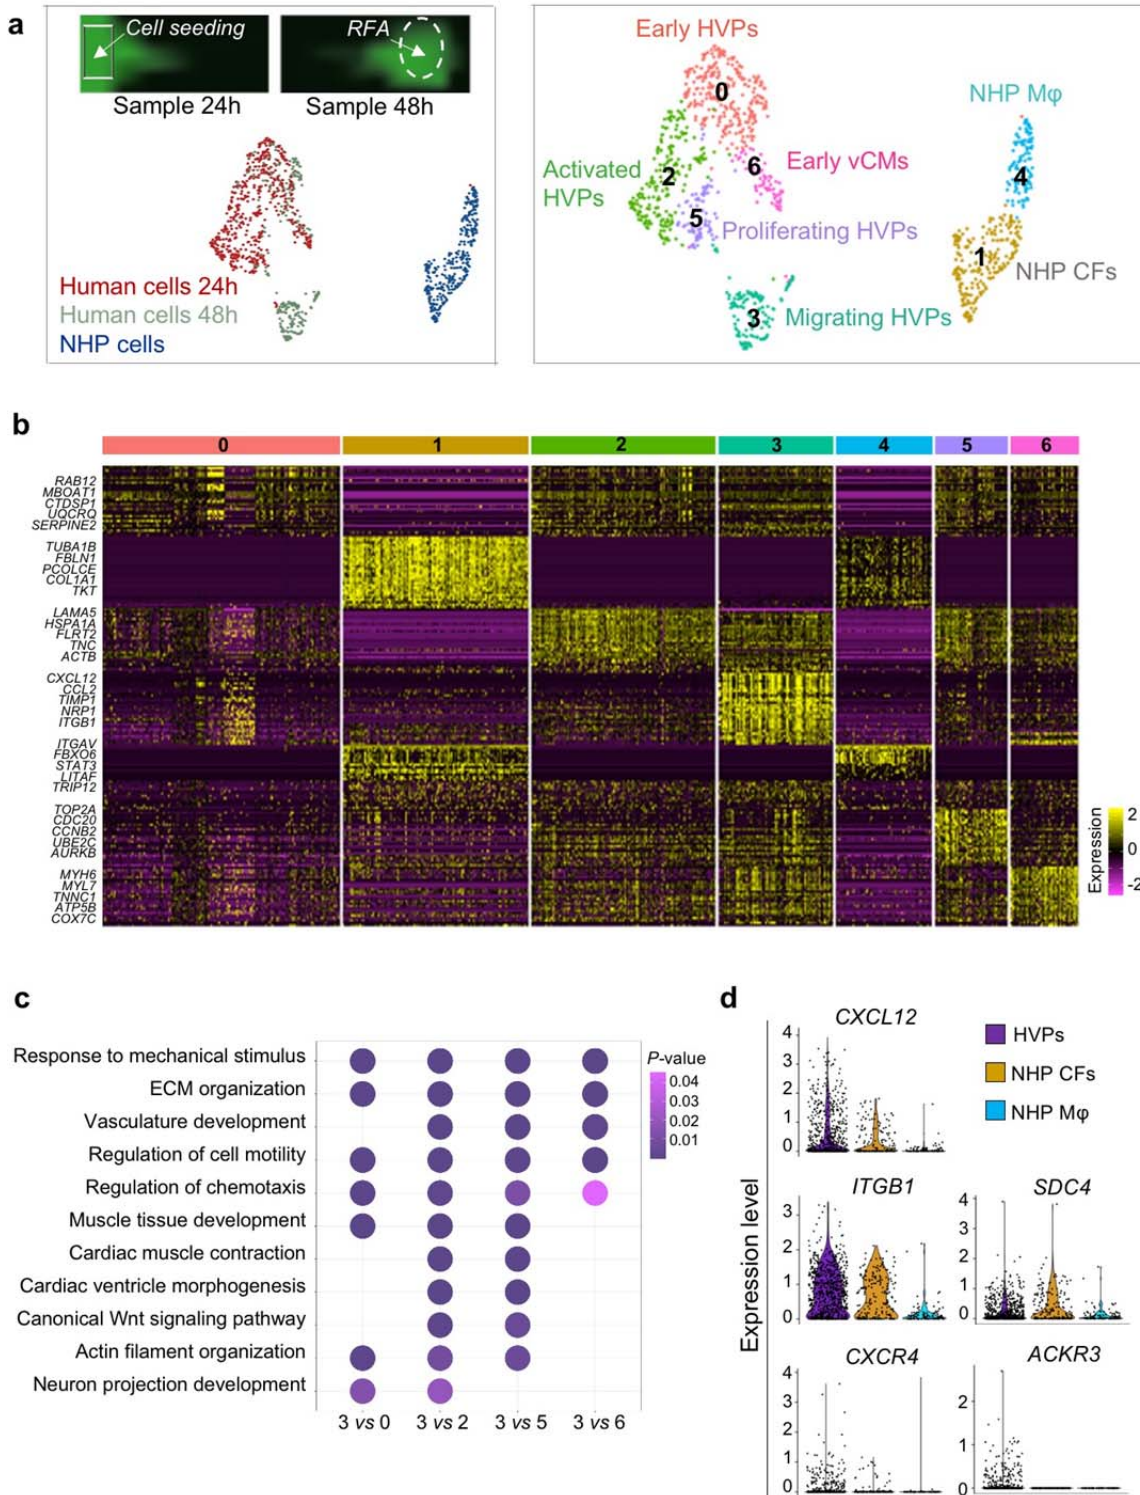

932

933 **Extended Data Figure 4. scRNAseq analysis of human  $NKX2.5^{eGFP/wt}$  HVPs and NHP**  
 934 **cardiac cells after acute RFA heart injury. a, Left, representative images of HVPs seeded on an**

935 injured NHP heart slice at the time points used for cell collection (24h and 48h) (top) and UMAP plot  
936 of all captured cells (bottom). Right, relative UMAP clustering of captured cells. NHP, non-human  
937 primate; RFA, radiofrequency ablation; HVPs, human ventricular progenitors; vCMs, ventricular  
938 cardiomyocytes; M $\phi$ , macrophages. **b**, Heatmap of top 50 genes in each cluster with representative  
939 genes indicated. **c**, Representative GO terms upregulated in cluster 3 (migrating HVPs) compared to  
940 the other human clusters (0, 2, 5, 6). **d**, Violin plots of *CXCL12* and its binding targets in HVPs, NHP  
941 CFs and NHP M $\phi$ .  
942

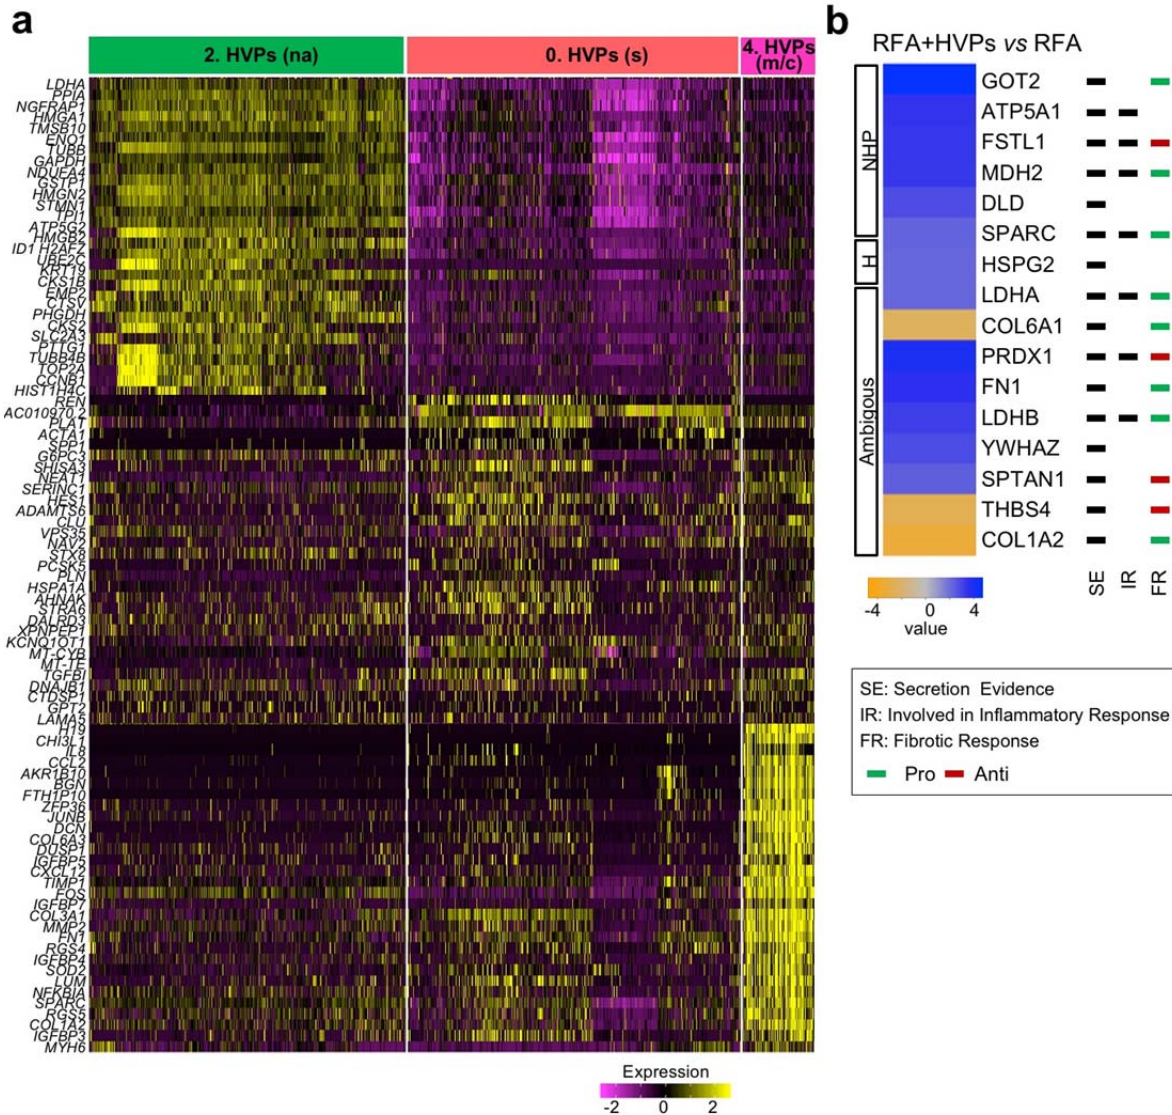

943

944 **Extended Data Figure 5. Gene signatures of dynamical cardiac progenitor states and**  
 945 **proteomic analysis of secretome during acute injury response. a,** Heatmap of top 30 genes  
 946 depicting the expression of DEGs in non-activated HVPs (cluster 2), sensing HVPs (cluster 0), and  
 947 migrating/contracting HVPs (cluster 4). **b,** Proteomic analysis of supernatant of injured NHP heart  
 948 slices with and without application of HVPs at 48h after RFA. NHP, H, and ambiguous, was assigned  
 949 to proteins for which the majority of identified peptides belonged to protein sequences of macaca  
 950 fascicularis, homo sapiens, or both species, respectively. n=3 biological replicates per group,  $p$ -value  
 951  $\leq 0.05$ .  
 952



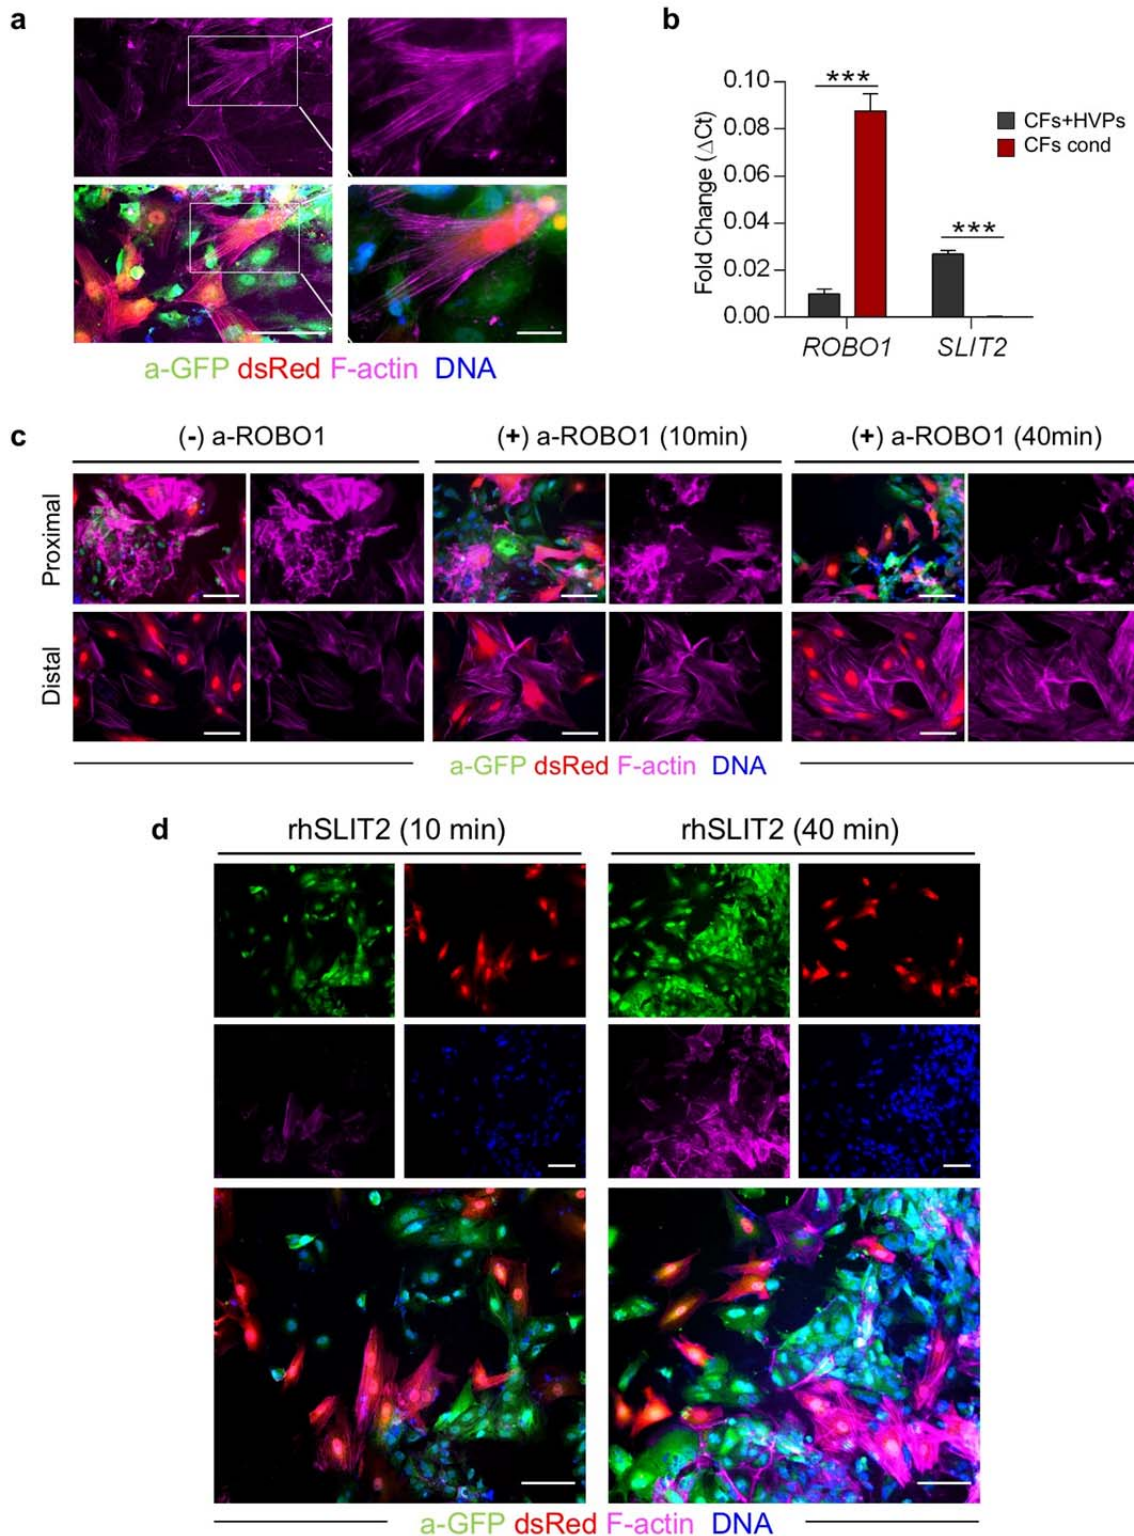

953

954 **Extended Data Figure 6. Analysis of CF repulsion signaling during acute injury response in**  
 955 **2D monolayer. a,** Representative images of eGFP<sup>+</sup> HVPs and dsRed<sup>+</sup> CFs after F-actin staining  
 956 during the repulsion phase in the injury area on D8. **b,** Quantitative RT-PCR analysis of *ROBO1* and

957 *SLIT2* expression in injured CFs cultured with HVPs (CFs+HVPs) or alone in conditioned medium  
958 from HVP-CF co-culture (CFs cond) on D8. Data are mean  $\pm$  SEM, n=2. \*\*\* $p$ <0.001 ( $t$ -test). **c**,  
959 Representative F-actin immunostaining on D8 in standard condition and after ROBO1 antibody  
960 exposure for 10 and 40 minutes showing CFs in contact with HVPs (proximal) and CFs in the remote  
961 area from the injury site (distal). **d**, Immunodetection of eGFP in conjunction with Phalloidin (F-actin)  
962 stain in HVP-CF co-culture on D8 after recombinant human *SLIT2* (rh*SLIT2*) exposure for 10 and 40  
963 minutes. Nuclei were counterstained with Hoechst and CFs are labelled with dsRed (**a**, **c**, **d**). Scale  
964 bar, 75  $\mu$ m (**a**, **c**, **d**).  
965

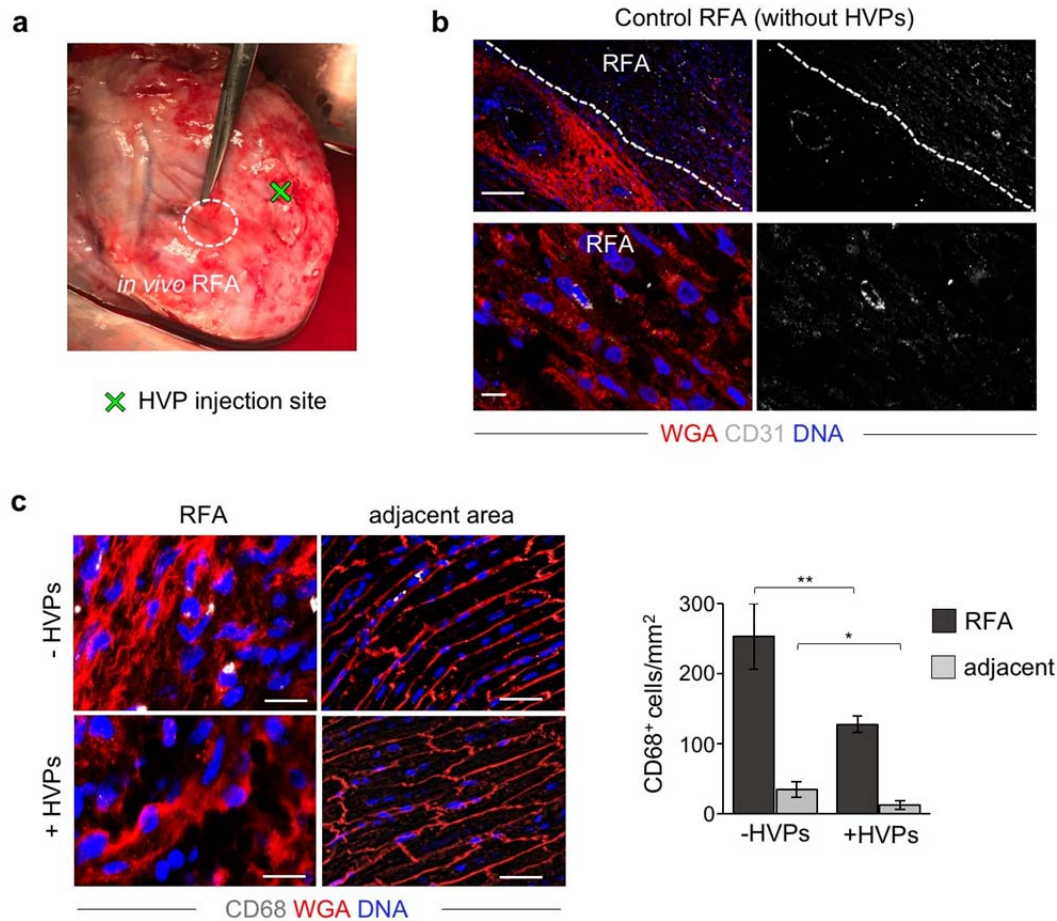

966

967 **Extended Data Figure 7. Macro- and microscopic analyses of LEA29Y pig hearts after RFA**  
 968 **injury and HVP injection *in vivo*.** **a**, Image of a freshly explanted LEA29Y pig heart 14 days after *in*  
 969 *in vivo* RFA and adjacent HVP injection showing no macroscopic signs of teratoma formation. **b**,  
 970 Representative fluorescence images of control RFA and adjacent area (top) or magnified zoom of  
 971 control RFA (bottom) after CD31 immunodetection and WGA labelling. Scale bars 100  $\mu$ m (top) and  
 972 10  $\mu$ m (bottom). **c**, Representative immunofluorescence stainings of CD68 (left) and correspondent  
 973 statistical analysis (right) in RFA and adjacent areas in the presence and absence of HVPs. Scale bars  
 974 25  $\mu$ m. Data are shown as mean  $\pm$  SEM, n=7 slices from 2 pigs per group. \*p<0.05, \*\*p<0.005 (*t*-  
 975 test).

976

977

978 **Supplementary Information**

979 **Supplementary Table 1.** Data source for scRNAseq and proteomic analyses

980 **Supplementary Table 2.** List of antibodies, fluorescent probes, recombinant proteins, and assays  
981 used in the study

982 **Extended Data Movie 1.** Time-lapse live imaging of HVPs (green) and NHP CFs (red) at the injury  
983 site (frame time: 90 minutes, duration: 3 days)

984 **Extended Data Movie 2.** RFA and cell transplantation procedure in LEA29Y porcine hearts

985

986

987

988

989

990

991

992

993

994
